# Supplementary material for: The structure of a β2-microglobulin fibril suggests a molecular basis for its amyloid polymorphism
Source: PubMed Central journal article supplement (PMC6207761; doi:10.1038/s41467-018-06761-6), 2018-10-30
Supplement: 41467_2018_6761_MOESM1_ESM.pdf [file 41467_2018_6761_MOESM1_ESM.pdf]

**Supplementary Information:**

ladanza et al, (2018). The structure of a  $\beta_2m$  fibril suggests a molecular basis for its amyloid polymorphism

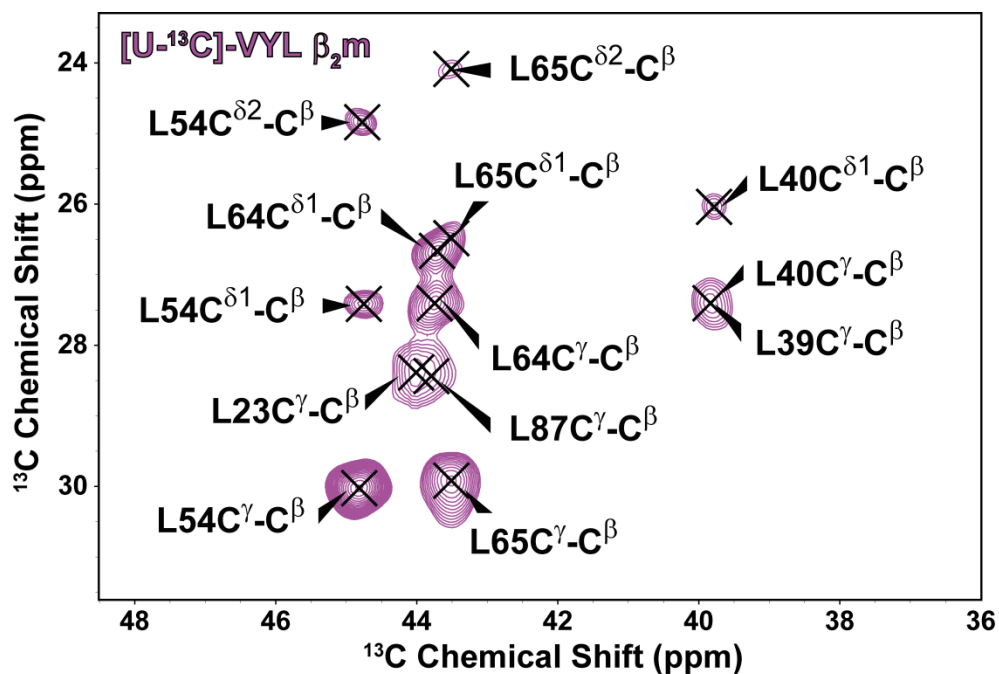

**Supplementary Figure 1 MAS-NMR of  $\beta_2m$  amyloid fibrils.** The region of a short-mixing time 2D  $^{13}C$ - $^{13}C$ -RFDR spectrum showing short-distance  $C^\beta$ - $C^\gamma$  correlations and medium-distance  $C^\beta$ - $C^\delta$  correlations of a  $[^{13}C]$ -VYL labelled sample shows no peak doubling, reinforcing the conclusion that the subunit making up the fibril core is monomorphic on a molecular level.

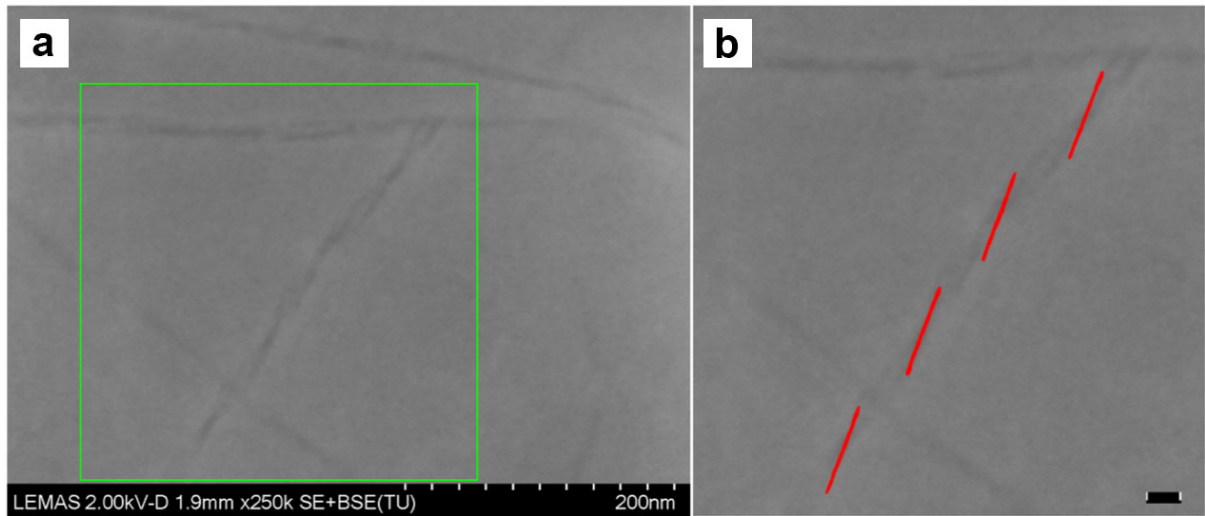

**Supplementary Figure 2. Scanning electron microscopy (SEM) images of fibrils verify the left-handed twist.** (A) SEM image of a two-protofilament fibril (type C in Figure 6 main text). (B) Zoomed in image for the green boxed area in panel A. Red lines trace the left-handed crossovers. Scale bar is 20 nm.

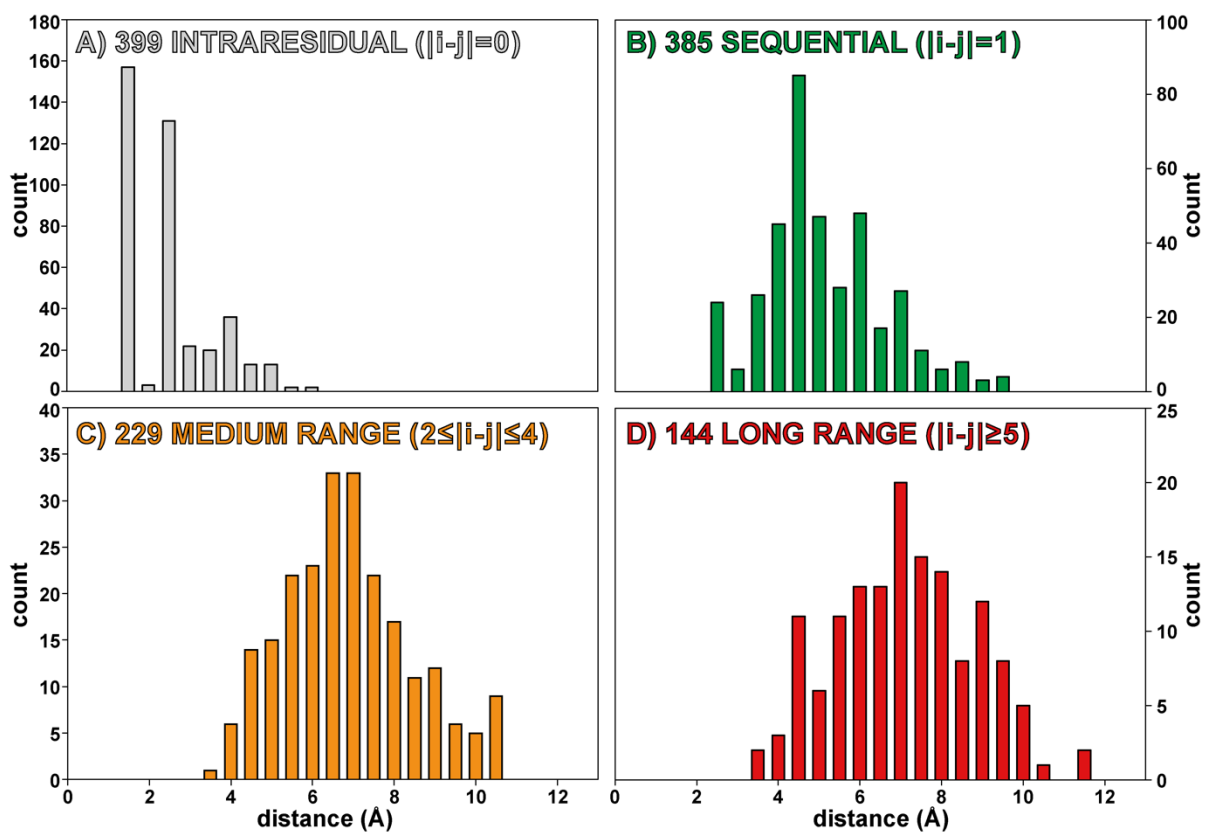

**Supplementary Figure 3. Histogram of contact distances observed by MAS NMR spectroscopy.** A total of 1157 contacts were observed, of which (A) 399 were classified as intra-residual, (B) 385 as sequential, (C) 229 as medium-range, and (D) 144 as long-range contacts. Distances were binned at a 0.5 Å step size.

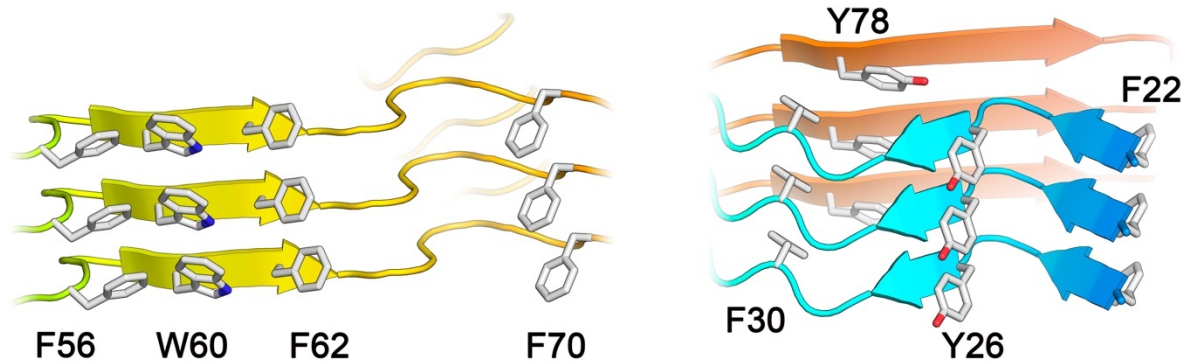

**Supplementary Figure 4. Canonical  $\pi$ -stacking stabilises the fibril structure.** The canonical parallel in-register cross- $\beta$  structure is maintained down the fibril long axis is supported by extensive  $\pi$ -stacking interactions between the aromatic residues F22, Y26, F30, F56, W60, F62, F70, and Y78 along the length of the core.

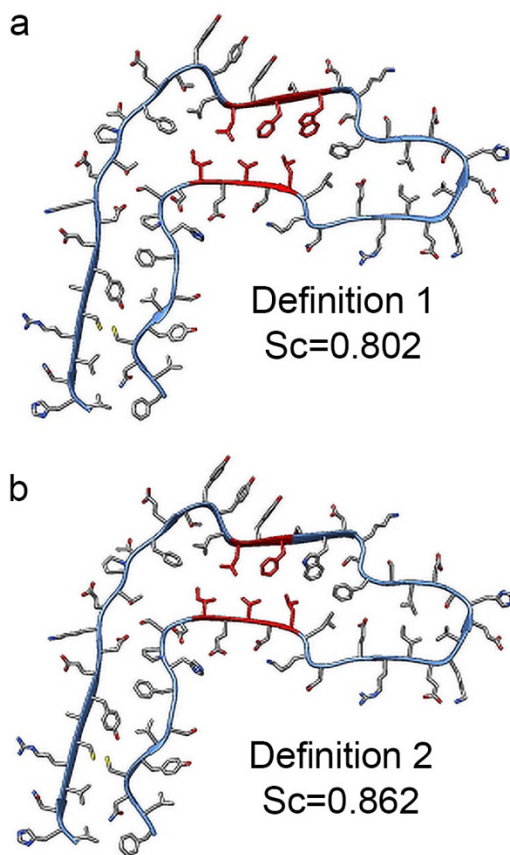

**Supplementary Figure 5. Surface complementarity calculations.** Surface complementarity was calculated using the program  $SC^1$ , including either 6 residues (a) or 5 residues (b) in the zipper (shown in red).

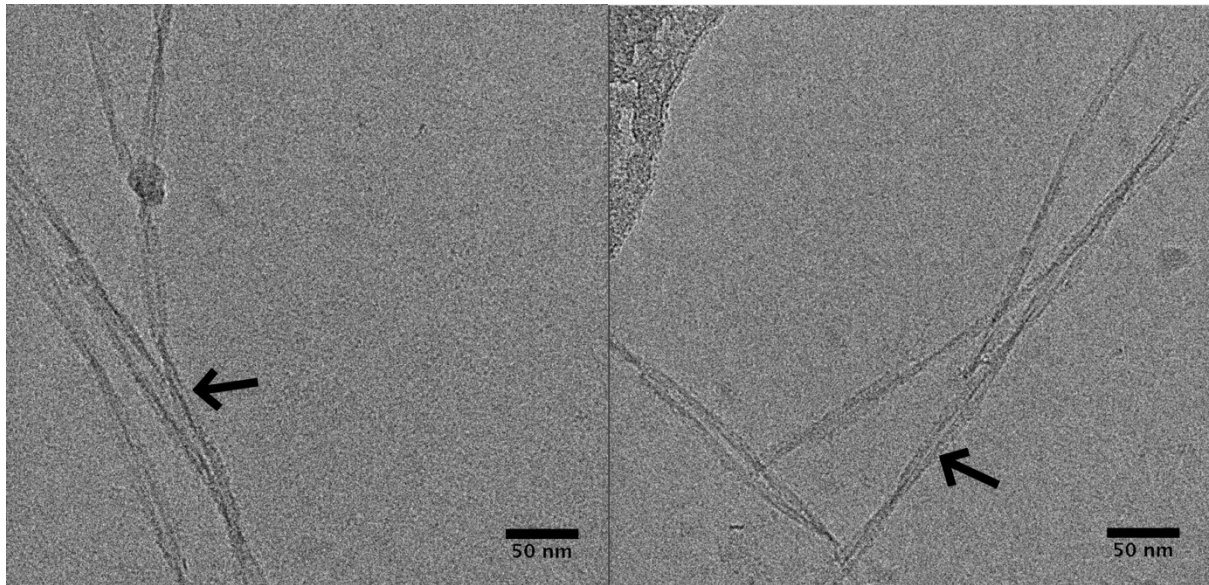

**Supplementary Figure 6. Higher order fibril assemblies.** Cryo-EM images of  $\beta_2m$  fibrils that appear to be composed of multiple copies of a common underlying fibril structure. Fibril morphologies twisting together are marked with arrows.

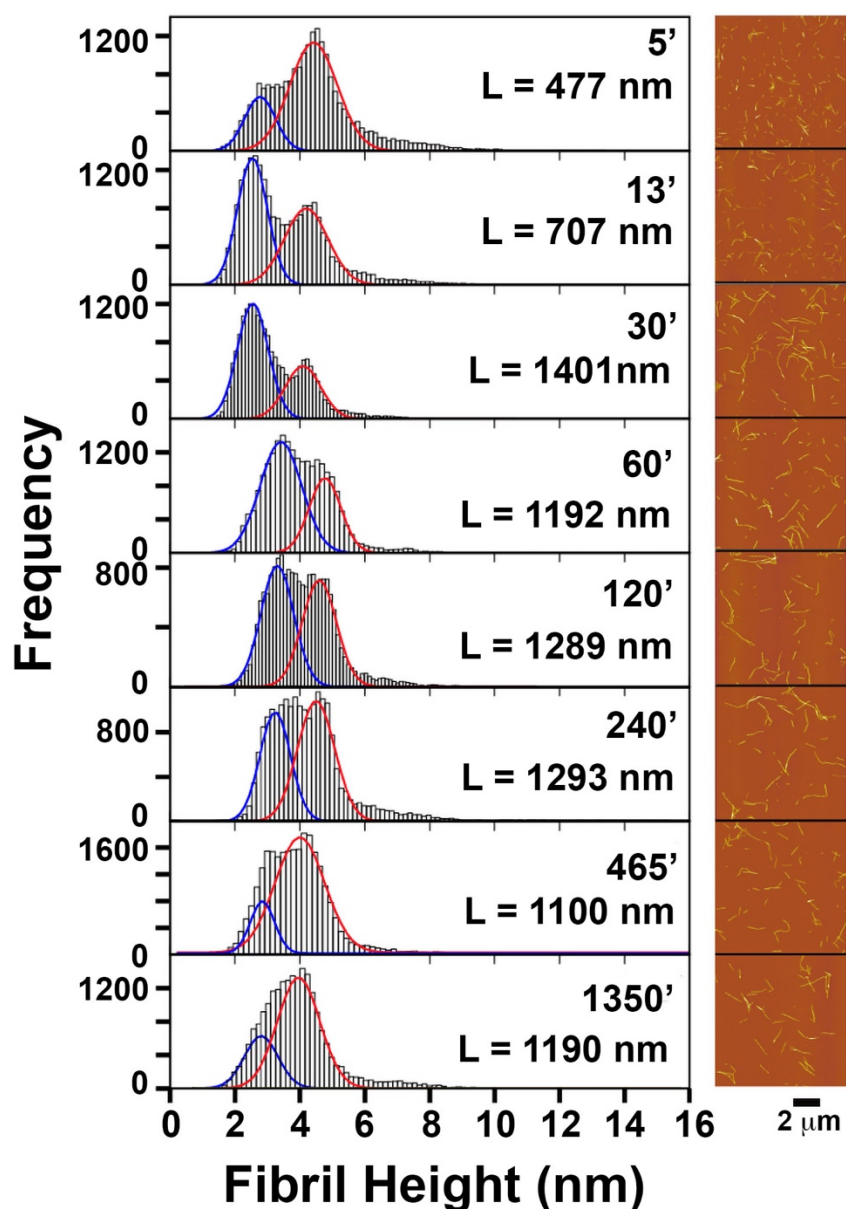

**Supplementary Figure 7. Single protofilament fibrils are precursors of higher order assemblies.** Histograms of fibril height were measured by AFM at various time-points after seeding was initiated. The fibril length ( $L$ ) is indicated in each plot. Representative AFM images are shown alongside. The red and blue lines represent fits to (two) Gaussian functions. These real-time studies of fibril height show that while both thin and thick filaments are formed rapidly in assembly, at early times thin fibrils are more highly populated, suggesting that these thicken during assembly via protofilament-protofilament interactions to create the array of polymorphs shown in Figure 6 (main text).

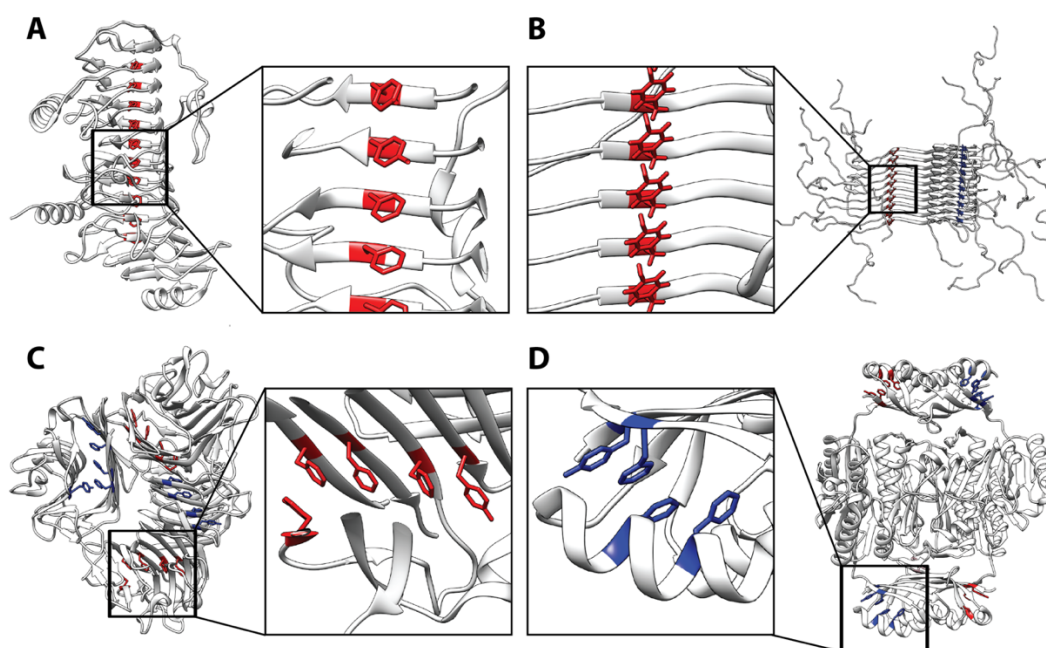

**Supplementary Figure 8. Examples of types multi-ring  $\pi$ -stacking interactions identified in the PDB.** (a) Parallel aromatic rings down the axis of a  $\beta$ -helix, illustrated using chondritonase B (pdb 1ofm)<sup>2</sup>. (b) Parallel to the axis of an amyloid fibril, illustrated using the MAS NMR structure of an  $\alpha$ -synuclein fibril (pdb 2n0a)<sup>3</sup>. (c) A ring-stack motif common to lectins, illustrated using peanut lectin (pdb 1cq9)<sup>4</sup>. (d) A unique ring stack motif found in *Pseudomonas putida* formyltetrahydrofolate deformylase (pdb 3nr).



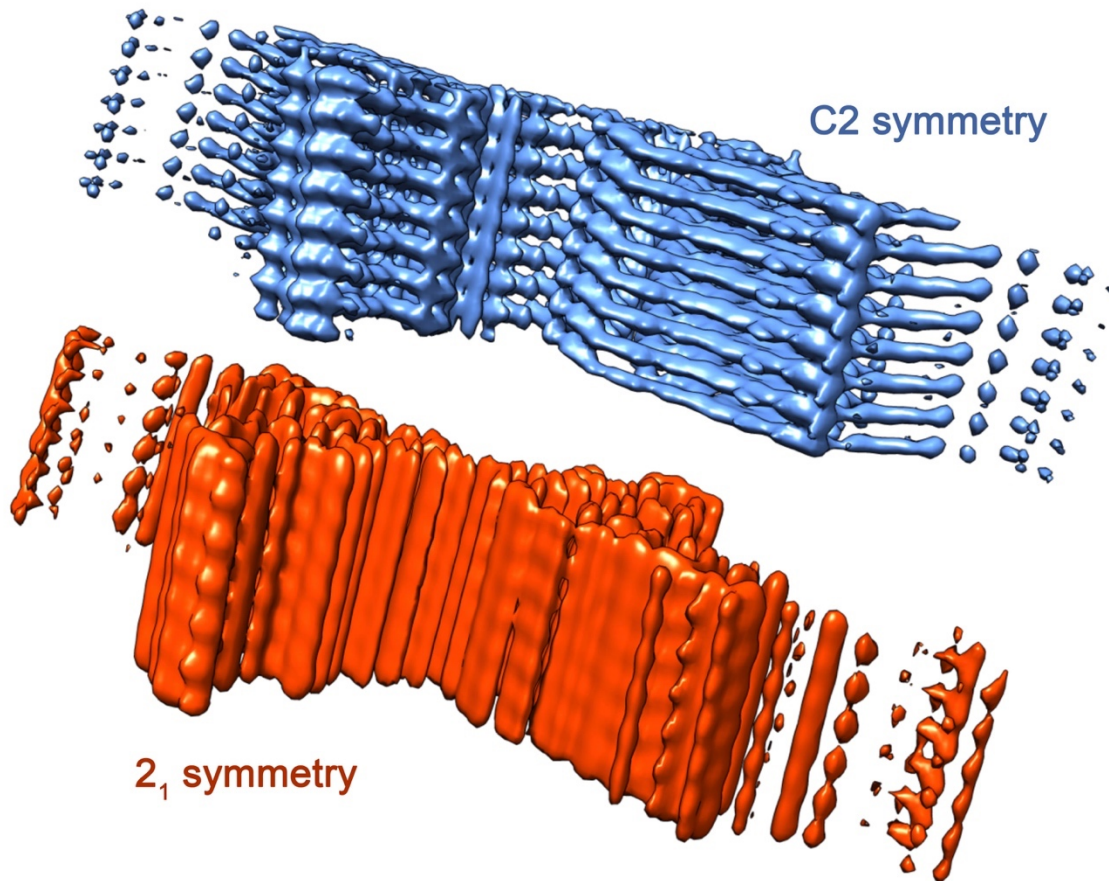

**Supplementary Figure 9. The symmetry of the two protofilament  $\beta_{2m}$  fibril.** Extensive trials of different symmetries were tested. Of particular interest were symmetries with either C2 or  $2_1$  screw axes. In an object with a  $2_1$  screw axis, the subunit in the two protofilaments are related by a  $180^\circ$  rotation and a translation, resulting in the two protofilaments being either in-register (C2) or out of register ( $2_1$ ). This is exemplified in the two conformers of Tau published recently<sup>5</sup>, where Tau PHFs have a  $2_1$  screw symmetry, but Tau SF do not. For  $\beta_{2m}$ , application of a  $2_1$  screw symmetry leads to loss of separation of the  $\beta$ -strands, and poorer resolution.

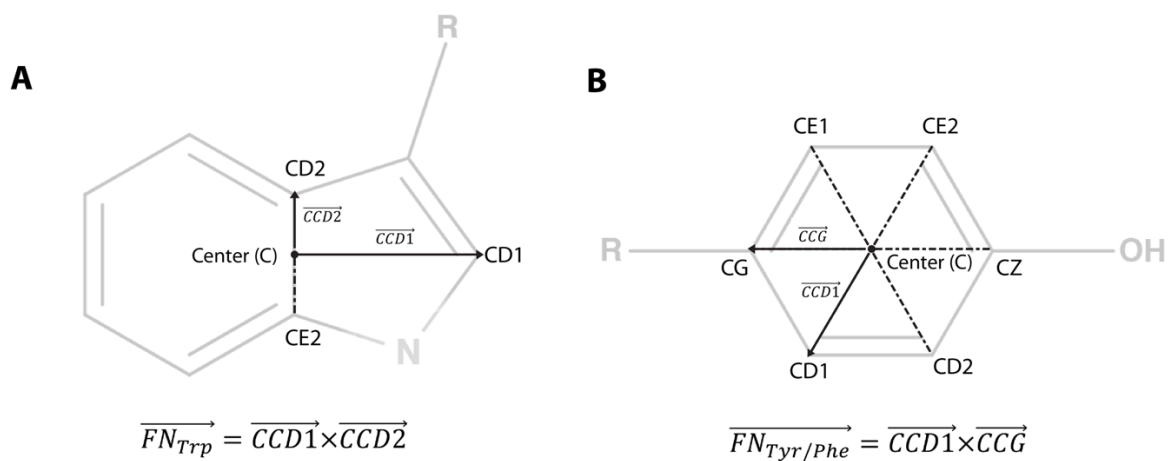

**Supplementary Figure 10. Parameters for defining face-to-face  $\pi$ -stacking interactions in the PDB.** Two aromatic rings were considered to be in a  $\pi$ -stack if the distance between centres was 6 Å or less and the angle between the two face-normal (FN) vectors (A & B) was  $0^\circ \pm 20^\circ$  or  $180^\circ \pm 20^\circ$ .

**Supplementary Table 1: Breakdown of the different fibril morphologies observed and their contribution to the two protofilament structure (labelled C in Figure 6, main text).**

| Fibril polymorph         | A   | B    | C    | D   | E   | F   | Multiple fibril aggregates |
|--------------------------|-----|------|------|-----|-----|-----|----------------------------|
| Number observed          | 132 | 884  | 1737 | 128 | 186 | 38  | 2590                       |
| % non-aggregated fibrils | 4.2 | 28.4 | 55.9 | 4.1 | 5.9 | 1.2 | n/a                        |
| Number in reconstruction | 0   | 0    | 622  | 0   | 0   | 0   | 0                          |
| % in reconstruction      | 0   | 0    | 35   | 0   | 0   | 0   | 0                          |

**Supplementary Table 2: Inter-nuclear contacts between atoms within an amino acid residue observed by MAS-NMR spectroscopy.**

| 1 <sup>st</sup> nucleus | 2 <sup>nd</sup> nucleus | 1 <sup>st</sup> nucleus | 2 <sup>nd</sup> nucleus | 1 <sup>st</sup> nucleus | 2 <sup>nd</sup> nucleus | 1 <sup>st</sup> nucleus | 2 <sup>nd</sup> nucleus |
|-------------------------|-------------------------|-------------------------|-------------------------|-------------------------|-------------------------|-------------------------|-------------------------|
| F22CA                   | F22CG                   | H31CB                   | H31C                    | L40CG                   | L40CB                   | K48CD                   | K48CA                   |
| L23CD1                  | L23CB                   | H31CB                   | H31CA                   | L40CD1                  | L40CA                   | K48CE                   | K48CA                   |
| L23CA                   | L23C                    | H31CA                   | H31CG                   | L40CA                   | L40C                    | K48CG                   | K48CA                   |
| L23CB                   | L23CA                   | H31CB                   | H31CE1                  | L40CB                   | L40C                    | K48CG                   | K48CB                   |
| L23CD1                  | L23CA                   | P32CB                   | P32CA                   | L40CD1                  | L40CG                   | K48CG                   | K48CD                   |
| L23CD1                  | L23CG                   | P32CB                   | P32CD                   | L40CD1                  | L40C                    | K48N                    | K48CB                   |
| L23CD1                  | L23C                    | P32CG                   | P32CA                   | L40CG                   | L40CA                   | V49CG1                  | V49CB                   |
| L23CD2                  | L23CA                   | P32CG                   | P32CD                   | L40CG                   | L40C                    | V49CG1                  | V49CA                   |
| L23CD2                  | L23CB                   | P32CD                   | P32CA                   | L40N                    | L40CA                   | V49CA                   | V49CB                   |
| L23CD2                  | L23CD1                  | P32N                    | P32CA                   | L40N                    | L40CB                   | V49CB                   | V49C                    |
| L23CD2                  | L23CG                   | P32N                    | P32CG                   | L40N                    | L40CD1                  | V49CG1                  | V49C                    |
| L23CG                   | L23CA                   | P32CA                   | P32C                    | L40N                    | L40CG                   | V49N                    | V49CA                   |
| L23CG                   | L23CB                   | P32CB                   | P32C                    | K41NZ                   | K41CE                   | V49N                    | V49CB                   |
| L23CG                   | L23C                    | P32CG                   | P32CB                   | K41CD                   | K41CE                   | H51CB                   | H51CA                   |
| L23N                    | L23CA                   | P32CG                   | P32C                    | K41CD                   | K41CA                   | H51CB                   | H51CE1                  |
| L23N                    | L23CD2                  | S33N                    | S33CA                   | K41CA                   | K41C                    | H51CB                   | H51CG                   |
| N24CB                   | N24CA                   | S33N                    | S33CB                   | N42CB                   | N42CA                   | H51CA                   | H51CG                   |
| N24ND2                  | N24CB                   | D34CB                   | D34CA                   | N42CB                   | N42CG                   | H51CA                   | H51CD2                  |
| C25CB                   | C25CA                   | I35CD1                  | I35CA                   | N42N                    | N42CA                   | H51CB                   | H51CD2                  |
| C25CB                   | C25C                    | I35CD1                  | I35CB                   | N42N                    | N42CB                   | H51CD2                  | H51CE1                  |
| C25N                    | C25CB                   | I35CD1                  | I35CG1                  | N42ND2                  | N42CA                   | S52CA                   | S52CB                   |
| Y26CA                   | Y26CZ                   | I35CD1                  | I35CG2                  | N42ND2                  | N42CB                   | S52CB                   | S52C                    |
| Y26CB                   | Y26CG                   | I35CG1                  | I35CA                   | G43CA                   | G43C                    | S52N                    | S52CA                   |
| Y26CB                   | Y26CZ                   | I35CG1                  | I35CB                   | G43N                    | G43CA                   | S52N                    | S52CB                   |
| Y26CB                   | Y26CA                   | I35CG2                  | I35CA                   | E44CB                   | E44CA                   | D53CB                   | D53CA                   |
| Y26CA                   | Y26C                    | I35CG2                  | I35CB                   | E44N                    | E44CB                   | L54CA                   | L54CB                   |
| Y26CA                   | Y26CE1                  | I35CD1                  | I35C                    | E44N                    | E44CG                   | L54CD2                  | L54CB                   |
| Y26CA                   | Y26CG                   | I35CB                   | I35CA                   | E44CB                   | E44CD                   | L54CG                   | L54CB                   |
| Y26CB                   | Y26CE1                  | I35N                    | I35CA                   | R45CB                   | R45CD                   | L54CA                   | L54CD1                  |
| V27CA                   | V27C                    | I35N                    | I35CB                   | R45CG                   | R45CB                   | L54CA                   | L54CD2                  |
| V27CB                   | V27CA                   | I35N                    | I35CD1                  | R45CG                   | R45CZ                   | L54CA                   | L54CG                   |
| V27CB                   | V27C                    | I35N                    | I35CG1                  | R45CG                   | R45CA                   | L54CB                   | L54CD1                  |
| V27CG1                  | V27CA                   | I35N                    | I35CG2                  | R45CG                   | R45CD                   | L54CD1                  | L54CG                   |
| V27CG1                  | V27C                    | I35CG2                  | I35CG1                  | I46CB                   | I46CA                   | L54CD2                  | L54CD1                  |
| V27CG2                  | V27CA                   | I35CG2                  | I35C                    | I46CD1                  | I46CA                   | L54CD2                  | L54CG                   |
| V27CG2                  | V27CB                   | E36CG                   | E36CD                   | I46CD1                  | I46CB                   | L54CA                   | L54C                    |
| V27CG2                  | V27CG1                  | V37CG2                  | V37CA                   | I46CD1                  | I46CG1                  | L54CB                   | L54C                    |
| V27CG2                  | V27C                    | V37CG2                  | V37CB                   | I46CD1                  | I46CG2                  | L54N                    | L54CB                   |
| V27N                    | V27CA                   | V37CG2                  | V37CG1                  | I46CG1                  | I46CA                   | L54N                    | L54CD1                  |
| V27N                    | V27CG1                  | V37N                    | V37CG2                  | I46CG1                  | I46CB                   | L54N                    | L54CD2                  |
| V27N                    | V27CG2                  | V37CG1                  | V37CB                   | I46CG2                  | I46CA                   | L54N                    | L54CG                   |
| S28CA                   | S28CB                   | L39CA                   | L39C                    | I46CG2                  | I46CB                   | S55CA                   | S55CB                   |
| S28N                    | S28CB                   | L39CB                   | L39CA                   | I46CG2                  | I46CG1                  | S55N                    | S55CA                   |
| G29N                    | G29CA                   | L39CB                   | L39C                    | I46CD1                  | I46C                    | F56CB                   | F56CA                   |
| F30CA                   | F30CG                   | L39CD1                  | L39CA                   | I46N                    | I46CA                   | F56CA                   | F56CG                   |
| F30CB                   | F30CG                   | L39CD1                  | L39C                    | I46N                    | I46CD1                  | F56CB                   | F56CG                   |
| F30CB                   | F30CA                   | L39CD2                  | L39CA                   | I46N                    | I46CG1                  | F56CB                   | F56C                    |
| F30CE1                  | F30CG                   | L39CD2                  | L39CD1                  | I46N                    | I46CG2                  | F56CA                   | F56CE1                  |
| F30CB                   | F30CD2                  | L39CG                   | L39CB                   | K48CB                   | K48CD                   | F56CE1                  | F56CG                   |
| H31CA                   | H31CE1                  | L39CD2                  | L39CB                   | K48CB                   | K48CE                   | F56N                    | F56CB                   |
| H31CA                   | H31C                    | L39CD1                  | L39CB                   | K48CD                   | K48CE                   | F56CB                   | F56CD1                  |
| H31CB                   | H31CD2                  | L40CB                   | L40CA                   | K48CG                   | K48CE                   | S57CA                   | S57CB                   |
| H31CB                   | H31CG                   | L40CD1                  | L40CB                   | K48CB                   | K48CA                   | S57N                    | S57CA                   |

| 1 <sup>st</sup> nucleus | 2 <sup>nd</sup> nucleus |
|-------------------------|-------------------------|
| K58CD                   | K58CB                   |
| K58CB                   | K58CA                   |
| K58CD                   | K58CA                   |
| K58CG                   | K58CA                   |
| K58CG                   | K58CB                   |
| K58CG                   | K58CD                   |
| D59CB                   | D59CA                   |
| D59N                    | D59CB                   |
| W60N                    | W60CG                   |
| W60CA                   | W60CG                   |
| W60CA                   | W60CD1                  |
| W60CA                   | W60CZ2                  |
| W60CB                   | W60CA                   |
| W60CB                   | W60CD1                  |
| W60CB                   | W60CG                   |
| W60CB                   | W60CZ2                  |
| W60CD1                  | W60CE2                  |
| W60CD1                  | W60CG                   |
| W60CA                   | W60CD2                  |
| W60CA                   | W60CH2                  |
| W60CB                   | W60CD2                  |
| W60CB                   | W60CH2                  |
| W60CG                   | W60CD2                  |
| W60CG                   | W60CH2                  |
| W60CG                   | W60CZ2                  |
| W60CH2                  | W60CD1                  |
| W60CH2                  | W60CD2                  |
| W60CH2                  | W60CE2                  |
| W60CZ2                  | W60CD2                  |
| W60CZ2                  | W60CH2                  |
| W60N                    | W60CA                   |
| W60NE1                  | W60CD1                  |
| W60CA                   | W60CE3                  |
| W60CB                   | W60CE2                  |
| W60CB                   | W60CE3                  |
| W60CE3                  | W60CE2                  |
| W60CA                   | W60CE2                  |
| W60CD1                  | W60CD2                  |
| W60CD1                  | W60CE3                  |
| W60CD2                  | W60CE2                  |
| W60CD2                  | W60CE3                  |
| W60CE2                  | W60C                    |
| W60NE1                  | W60CE2                  |
| S61CA                   | S61CB                   |
| S61CA                   | S61C                    |
| S61CB                   | S61C                    |
| F62CA                   | F62CB                   |
| F62CB                   | F62CG                   |
| F62CA                   | F62CG                   |
| F62CZ                   | F62CD1                  |
| F62CZ                   | F62CD2                  |
| F62N                    | F62CB                   |
| F62CB                   | F62CD1                  |

| 1 <sup>st</sup> nucleus | 2 <sup>nd</sup> nucleus |
|-------------------------|-------------------------|
| Y63CA                   | Y63CG                   |
| Y63CA                   | Y63CZ                   |
| Y63CB                   | Y63CA                   |
| Y63CB                   | Y63CG                   |
| L64CD1                  | L64CB                   |
| L64CB                   | L64CA                   |
| L64CA                   | L64CD2                  |
| L64CA                   | L64CG                   |
| L64CD2                  | L64CB                   |
| L64CD2                  | L64CG                   |
| L64CG                   | L64CB                   |
| L64CA                   | L64C                    |
| L64CD1                  | L64CA                   |
| L64N                    | L64CA                   |
| L64N                    | L64CB                   |
| L64N                    | L64CD2                  |
| L65CD2                  | L65CB                   |
| L65CG                   | L65CB                   |
| L65CA                   | L65CB                   |
| L65CA                   | L65CD1                  |
| L65CA                   | L65CD2                  |
| L65CD1                  | L65CG                   |
| L65CD2                  | L65CD1                  |
| L65CD2                  | L65CG                   |
| L65CA                   | L65C                    |
| L65CD1                  | L65CB                   |
| L65N                    | L65CA                   |
| L65N                    | L65CB                   |
| L65N                    | L65CD1                  |
| L65N                    | L65CD2                  |
| L65N                    | L65CG                   |
| Y67CA                   | Y67CZ                   |
| Y67CB                   | Y67CE1                  |
| Y67CB                   | Y67CZ                   |
| Y67CE1                  | Y67CZ                   |
| T68CA                   | T68CB                   |
| T68CG2                  | T68CA                   |
| T68CG2                  | T68CB                   |
| T68N                    | T68CB                   |
| E69CB                   | E69CA                   |
| F70CB                   | F70CA                   |
| F70CA                   | F70CG                   |
| F70CA                   | F70CD2                  |
| F70CA                   | F70CE1                  |
| F70CD2                  | F70CE1                  |
| T71CA                   | T71CB                   |
| T71CG2                  | T71CB                   |
| T71CG2                  | T71CA                   |
| P72CB                   | P72CA                   |
| P72CG                   | P72CA                   |
| P72CD                   | P72CA                   |
| P72N                    | P72CA                   |
| P72N                    | P72CB                   |

| 1 <sup>st</sup> nucleus | 2 <sup>nd</sup> nucleus |
|-------------------------|-------------------------|
| P72N                    | P72CG                   |
| T73CA                   | T73CB                   |
| T73CG2                  | T73CA                   |
| T73CG2                  | T73CB                   |
| T73CB                   | T73C                    |
| T73N                    | T73CB                   |
| E74CB                   | E74CG                   |
| E74CA                   | E74CD                   |
| E74N                    | E74CG                   |
| E74CG                   | E74CA                   |
| E74CB                   | E74CA                   |
| K75N                    | K75CD                   |
| K75CD                   | K75CA                   |
| K75CG                   | K75CA                   |
| K75CG                   | K75CB                   |
| K75CG                   | K75CD                   |
| K75CB                   | K75CA                   |
| K75CG                   | K75CE                   |
| K75CB                   | K75CE                   |
| K75CD                   | K75CE                   |
| K75CD                   | K75CB                   |
| D76CB                   | D76CA                   |
| D76CB                   | D76CG                   |
| Y78CA                   | Y78CZ                   |
| Y78CD2                  | Y78CZ                   |
| Y78CE1                  | Y78CZ                   |
| Y78CB                   | Y78CA                   |
| Y78CA                   | Y78CD1                  |
| Y78CA                   | Y78CD2                  |
| Y78CA                   | Y78CE1                  |
| Y78CA                   | Y78CG                   |
| Y78CA                   | Y78C                    |
| Y78CB                   | Y78CD1                  |
| Y78CB                   | Y78CD2                  |
| Y78CB                   | Y78CE1                  |
| Y78CB                   | Y78CG                   |
| Y78CD1                  | Y78C                    |
| Y78CD2                  | Y78C                    |
| Y78CE1                  | Y78C                    |
| Y78CG                   | Y78C                    |
| Y78CZ                   | Y78C                    |
| Y78CE1                  | Y78CG                   |
| Y78CE1                  | Y78CD1                  |
| Y78CE1                  | Y78CD2                  |
| A79CB                   | A79CA                   |
| A79N                    | A79CA                   |
| A79N                    | A79CB                   |
| C80CB                   | C80CA                   |
| C80N                    | C80CB                   |
| R81NE                   | R81CB                   |
| R81NE                   | R81CD                   |
| R81NE                   | R81CG                   |
| R81NH1                  | R81CZ                   |

| 1 <sup>st</sup> nucleus | 2 <sup>nd</sup> nucleus |
|-------------------------|-------------------------|
| R81CB                   | R81CD                   |
| R81CG                   | R81CB                   |
| R81CG                   | R81CD                   |
| R81CD                   | R81CZ                   |
| R81CB                   | R81CA                   |
| R81CD                   | R81CA                   |
| R81CG                   | R81CA                   |
| V82CG1                  | V82CA                   |
| V82CG1                  | V82CB                   |
| V82CG2                  | V82CA                   |
| V82CG2                  | V82CB                   |
| V82CA                   | V82CB                   |
| V82CG1                  | V82CG2                  |
| V82N                    | V82CA                   |
| V82N                    | V82CG1                  |
| V82N                    | V82CG2                  |
| N83CB                   | N83CA                   |
| H84CB                   | H84CG                   |
| H84CB                   | H84CA                   |
| H84CA                   | H84CD2                  |
| H84CB                   | H84CD2                  |
| H84CD2                  | H84CG                   |
| V85CG1                  | V85CB                   |
| V85CG2                  | V85CB                   |
| V85CG1                  | V85CA                   |
| V85CG2                  | V85CA                   |
| V85N                    | V85CG1                  |
| V85N                    | V85CG2                  |

**Supplementary Table 3: Inter-nuclear contacts between atoms within adjacent (in primary sequence) amino acid residues observed by MAS-NMR spectroscopy. Contacts coloured GREEN in Figure 3e.**

| 1 <sup>st</sup> nucleus | 2 <sup>nd</sup> nucleus | 1 <sup>st</sup> nucleus | 2 <sup>nd</sup> nucleus | 1 <sup>st</sup> nucleus | 2 <sup>nd</sup> nucleus | 1 <sup>st</sup> nucleus | 2 <sup>nd</sup> nucleus |
|-------------------------|-------------------------|-------------------------|-------------------------|-------------------------|-------------------------|-------------------------|-------------------------|
| F22CG                   | L23CB                   | H31CA                   | P32CA                   | N42CA                   | G43CA                   | K48CD                   | V49CB                   |
| F22CG                   | L23CG                   | H31CG                   | P32CD                   | N42CB                   | G43CA                   | K48CB                   | V49CG1                  |
| L23CA                   | N24N                    | H31CE1                  | P32CA                   | N42CB                   | G43C                    | K48CG                   | V49CB                   |
| L23CA                   | N24CB                   | P32CD                   | S33CB                   | N42CG                   | G43CA                   | K48CA                   | V49CG1                  |
| N24CA                   | C25CB                   | P32CA                   | S33CA                   | N42CA                   | G43N                    | K48CD                   | V49CG1                  |
| N24CA                   | C25CA                   | P32CD                   | S33CA                   | N42CB                   | G43N                    | V49CG1                  | E50CA                   |
| N24CB                   | C25CB                   | P32CB                   | S33CA                   | G43CA                   | E44CB                   | V49CG1                  | E50CB                   |
| C25N                    | Y26CA                   | P32CA                   | S33CB                   | G43CA                   | E44CD                   | V49CA                   | E50CA                   |
| C25CB                   | Y26N                    | P32CA                   | S33N                    | G43CA                   | E44C                    | V49CB                   | E50CB                   |
| C25CA                   | Y26CB                   | P32CB                   | S33N                    | G43CA                   | E44CA                   | V49CB                   | E50CA                   |
| Y26CA                   | V27CA                   | P32CD                   | S33N                    | G43N                    | E44CA                   | E50CA                   | H51CA                   |
| Y26CA                   | V27C                    | P32CG                   | S33N                    | G43N                    | E44CB                   | E50CB                   | H51CA                   |
| Y26CB                   | V27CA                   | P32CB                   | S33CB                   | G43N                    | E44CG                   | E50CB                   | H51CB                   |
| Y26CB                   | V27C                    | P32C                    | S33CB                   | G43CA                   | E44N                    | E50CA                   | H51CG                   |
| Y26CA                   | V27CG1                  | S33CA                   | D34CA                   | G43CA                   | E44CG                   | E50C                    | H51CA                   |
| Y26CA                   | V27CG2                  | S33N                    | D34CB                   | E44N                    | R45CG                   | E50CA                   | H51CD2                  |
| Y26N                    | V27CA                   | D34CA                   | I35CD1                  | R45CA                   | I46CA                   | E50CB                   | H51CD2                  |
| Y26CB                   | V27N                    | D34CA                   | I35CG1                  | R45CA                   | I46CD1                  | E50CA                   | H51CE1                  |
| Y26CE1                  | V27CA                   | D34CA                   | I35CG2                  | R45CB                   | I46CD1                  | E50CB                   | H51CE1                  |
| Y26CG                   | V27CA                   | D34CA                   | I35N                    | R45CA                   | I46CG2                  | E50C                    | H51C                    |
| Y26CE1                  | V27CB                   | D34CB                   | I35CG1                  | R45CB                   | I46CG2                  | H51CA                   | S52CA                   |
| V27CA                   | S28N                    | D34CB                   | I35CG2                  | R45C                    | I46CD1                  | H51CA                   | S52CB                   |
| V27CA                   | S28CA                   | D34CA                   | I35CA                   | R45CA                   | I46CB                   | H51CB                   | S52CB                   |
| S28CA                   | G29CA                   | I35CD1                  | E36CA                   | R45CB                   | I46CA                   | H51CG                   | S52CB                   |
| S28CB                   | G29CA                   | I35CG2                  | E36CA                   | R45CG                   | I46CB                   | H51CA                   | S52C                    |
| S28C                    | G29CA                   | I35CB                   | E36CA                   | R45CA                   | I46CG1                  | H51CG                   | S52CA                   |
| S28CB                   | G29N                    | I35CA                   | E36N                    | R45CD                   | I46CG1                  | H51CA                   | S52N                    |
| G29CA                   | F30CA                   | I35CD1                  | E36N                    | I46CB                   | E47CA                   | H51CB                   | S52N                    |
| G29CA                   | F30CB                   | I35CG1                  | E36N                    | I46CD1                  | E47CA                   | H51C                    | S52CA                   |
| G29CA                   | F30C                    | I35CG2                  | E36N                    | I46CD1                  | E47CG                   | H51CD2                  | S52CB                   |
| G29CA                   | F30CG                   | I35CA                   | E36CA                   | I46CG1                  | E47CG                   | H51C                    | S52CB                   |
| F30CA                   | H31C                    | I35CA                   | E36CB                   | I46CG2                  | E47CA                   | H51C                    | S52C                    |
| F30CB                   | H31CD2                  | E36CG                   | V37CB                   | I46CG2                  | E47CG                   | S52CA                   | D53CA                   |
| F30CB                   | H31C                    | E36CA                   | V37CB                   | I46CA                   | E47CB                   | S52CB                   | D53CA                   |
| F30C                    | H31C                    | V37CG2                  | D38CA                   | I46CB                   | E47CB                   | S52CA                   | D53CB                   |
| F30CA                   | H31CG                   | V37CG1                  | D38CA                   | I46CG2                  | E47N                    | S52CB                   | D53CB                   |
| F30CA                   | H31CA                   | D38CA                   | L39CG                   | I46CD1                  | E47CB                   | S52N                    | D53CA                   |
| F30CG                   | H31CA                   | D38CA                   | L39CB                   | I46CG1                  | E47CA                   | S52CB                   | D53N                    |
| F30CG                   | H31CG                   | L39CA                   | L40CA                   | I46CG2                  | E47CB                   | D53CA                   | L54CB                   |
| F30CB                   | H31CB                   | L39CA                   | L40C                    | I46CA                   | E47CA                   | D53CB                   | L54CB                   |
| F30CD2                  | H31CB                   | L39CD2                  | L40CA                   | I46CG1                  | E47CB                   | D53N                    | L54CD2                  |
| H31CB                   | P32CA                   | L39C                    | L40CA                   | E47CA                   | K48CA                   | D53CA                   | L54CG                   |
| H31CA                   | P32CD                   | L39CA                   | L40CG                   | E47CB                   | K48CE                   | D53CA                   | L54CD1                  |
| H31C                    | P32CA                   | L39C                    | L40C                    | E47CA                   | K48CG                   | D53CA                   | L54CD2                  |
| H31CG                   | P32CB                   | L39CA                   | L40N                    | E47CB                   | K48CG                   | D53CA                   | L54CA                   |
| H31C                    | P32CB                   | L39CD2                  | L40N                    | E47CB                   | K48CA                   | D53CB                   | L54CA                   |
| H31CD2                  | P32CD                   | L39CB                   | L40CA                   | E47CA                   | K48CB                   | D53CB                   | L54CD1                  |
| H31C                    | P32CD                   | L40CB                   | K41CG                   | E47CA                   | K48CD                   | D53CB                   | L54CD2                  |
| H31CD2                  | P32CG                   | K41CE                   | N42CB                   | E47CB                   | K48CB                   | L54CB                   | S55CB                   |
| H31CG                   | P32CG                   | K41C                    | N42CB                   | E47CB                   | K48CD                   | L54CD1                  | S55CB                   |
| H31C                    | P32CG                   | K41CG                   | N42N                    | K48CA                   | V49CA                   | L54CA                   | S55N                    |
| H31C                    | P32C                    | K41CA                   | N42CA                   | K48CB                   | V49CA                   | L54CB                   | S55N                    |
| H31CA                   | P32CB                   | K41CA                   | N42CB                   | K48CB                   | V49CB                   | L54CD1                  | S55N                    |

| 1 <sup>st</sup> nucleus | 2 <sup>nd</sup> nucleus |
|-------------------------|-------------------------|
| L54CD2                  | S55N                    |
| L54CG                   | S55N                    |
| L54CB                   | S55CA                   |
| L54C                    | S55CB                   |
| L54CA                   | S55CB                   |
| L54CA                   | S55CA                   |
| S55CA                   | F56CA                   |
| S55CB                   | F56CA                   |
| S55CA                   | F56CB                   |
| S55CB                   | F56CB                   |
| S55C                    | F56CB                   |
| S55CA                   | F56CG                   |
| S55CB                   | F56CG                   |
| F56CB                   | S57CA                   |
| F56CB                   | S57CB                   |
| F56CB                   | S57C                    |
| F56CA                   | S57CA                   |
| F56CE1                  | S57CA                   |
| F56CG                   | S57CA                   |
| F56CB                   | S57N                    |
| F56CA                   | S57CB                   |
| S57CB                   | K58CA                   |
| S57CB                   | K58CB                   |
| S57CB                   | K58CD                   |
| S57CA                   | K58CA                   |
| S57CA                   | K58CG                   |
| S57CB                   | K58CG                   |
| K58CG                   | D59CA                   |
| K58CA                   | D59CA                   |
| K58CA                   | D59N                    |
| K58CB                   | D59CA                   |
| K58CD                   | D59CA                   |
| K58CA                   | D59CB                   |
| D59CA                   | W60N                    |
| D59CB                   | W60N                    |
| D59CA                   | W60CD1                  |
| D59CA                   | W60CE2                  |
| D59CA                   | W60CE3                  |
| D59CB                   | W60CD1                  |
| D59CB                   | W60CE2                  |
| W60CA                   | S61CB                   |
| W60CG                   | S61CA                   |
| W60CD1                  | S61CB                   |
| W60CE2                  | S61CB                   |
| W60CA                   | S61C                    |
| W60CD2                  | S61CA                   |
| W60CH2                  | S61CA                   |
| W60N                    | S61CB                   |
| W60CE3                  | S61CB                   |
| W60CB                   | S61CB                   |
| W60CE2                  | S61CA                   |
| S61CA                   | F62CB                   |
| S61CB                   | F62CB                   |

| 1 <sup>st</sup> nucleus | 2 <sup>nd</sup> nucleus |
|-------------------------|-------------------------|
| S61CA                   | F62CA                   |
| S61CB                   | F62CA                   |
| S61CB                   | F62CE1                  |
| S61C                    | F62CA                   |
| S61CA                   | F62CD2                  |
| S61CA                   | F62CG                   |
| S61CB                   | F62CD2                  |
| F62CB                   | Y63CA                   |
| F62CA                   | Y63CG                   |
| F62CG                   | Y63CA                   |
| F62CB                   | Y63CB                   |
| Y63CA                   | L64CA                   |
| Y63CB                   | L64CA                   |
| Y63CB                   | L64CB                   |
| Y63CG                   | L64C                    |
| Y63CG                   | L64CA                   |
| Y63CZ                   | L64CA                   |
| Y63CB                   | L64CD1                  |
| Y63CG                   | L64CD2                  |
| Y63CB                   | L64CG                   |
| Y63N                    | L64CA                   |
| L64CA                   | L65CD2                  |
| L64CA                   | L65CA                   |
| L64CG                   | L65CD2                  |
| L64CA                   | L65C                    |
| L64CA                   | L65CG                   |
| L64N                    | L65CA                   |
| L64CA                   | L65N                    |
| L64CG                   | L65N                    |
| L64CA                   | L65CB                   |
| L65CA                   | Y66CA                   |
| L65CD1                  | Y66CB                   |
| L65CG                   | Y66CB                   |
| L65CA                   | Y66CB                   |
| L65CB                   | Y66CB                   |
| Y66CB                   | Y67CB                   |
| Y67CA                   | T68CB                   |
| Y67C                    | T68CB                   |
| Y67CB                   | T68CB                   |
| T68CB                   | E69C                    |
| T68CB                   | E69CA                   |
| T68CB                   | E69CG                   |
| F70CA                   | T71CB                   |
| F70CB                   | T71CB                   |
| F70CD2                  | T71CA                   |
| T71CA                   | P72CA                   |
| T71CB                   | P72CB                   |
| T71CB                   | P72CD                   |
| T71CB                   | P72CG                   |
| T71CA                   | P72CB                   |
| P72CB                   | T73CB                   |
| P72CG                   | T73CB                   |
| P72CA                   | T73CG2                  |

| 1 <sup>st</sup> nucleus | 2 <sup>nd</sup> nucleus |
|-------------------------|-------------------------|
| P72CA                   | T73CB                   |
| T73CG2                  | E74CG                   |
| T73CB                   | E74CA                   |
| T73CB                   | E74CG                   |
| T73CB                   | E74CB                   |
| T73CB                   | E74N                    |
| T73CA                   | E74CA                   |
| T73CA                   | E74CG                   |
| E74CA                   | K75CA                   |
| E74CG                   | K75CG                   |
| E74CB                   | K75CA                   |
| E74CG                   | K75CB                   |
| E74CA                   | K75CB                   |
| E74CA                   | K75CG                   |
| K75CB                   | D76CA                   |
| K75CD                   | D76CA                   |
| K75CG                   | D76CA                   |
| K75CD                   | D76CB                   |
| K75CB                   | D76CB                   |
| K75CA                   | D76CA                   |
| K75CA                   | D76CB                   |
| D76CB                   | E77CA                   |
| D76CA                   | E77CG                   |
| D76CB                   | E77CG                   |
| D76CA                   | E77N                    |
| D76CA                   | E77CB                   |
| D76CB                   | E77CB                   |
| E77N                    | Y78CB                   |
| E77CB                   | Y78CD1                  |
| E77CA                   | Y78CD1                  |
| Y78CD2                  | A79CA                   |
| Y78CE1                  | A79CA                   |
| Y78CZ                   | A79CA                   |
| Y78CA                   | A79N                    |
| Y78CB                   | A79N                    |
| Y78CG                   | A79CA                   |
| Y78CD1                  | A79CB                   |
| A79CA                   | C80CA                   |
| A79CA                   | C80CB                   |
| A79N                    | C80CA                   |
| A79N                    | C80CB                   |
| A79CA                   | C80N                    |
| A79CB                   | C80CB                   |
| C80CA                   | R81CA                   |
| C80CB                   | R81CD                   |
| C80CA                   | R81CD                   |
| C80CB                   | R81CA                   |
| C80CB                   | R81CB                   |
| R81CA                   | V82CA                   |
| R81CG                   | V82CA                   |
| R81CD                   | V82CG1                  |
| R81CD                   | V82CG2                  |
| R81CB                   | V82CG1                  |

| 1 <sup>st</sup> nucleus | 2 <sup>nd</sup> nucleus |
|-------------------------|-------------------------|
| R81CA                   | V82CG1                  |
| R81CA                   | V82CG2                  |
| R81CB                   | V82CG2                  |
| V82CA                   | N83N                    |
| V82CG1                  | N83CA                   |
| V82CG2                  | N83CA                   |
| N83CB                   | H84CG                   |
| N83CA                   | H84CD2                  |
| N83CB                   | H84CD2                  |
| N83CA                   | H84CB                   |
| N83CA                   | H84CE1                  |
| H84CB                   | V85CA                   |
| H84CD2                  | V85CG1                  |
| H84CE1                  | V85CB                   |

**Supplementary Table 4: Inter-nuclear contacts between atoms within amino acid residues that are near in the primary sequence (within 2-4 residues), observed by MAS-NMR spectroscopy. Contacts coloured ORANGE in Figure 3e.**

| 1 <sup>st</sup> nucleus | 2 <sup>nd</sup> nucleus | 1 <sup>st</sup> nucleus | 2 <sup>nd</sup> nucleus | 1 <sup>st</sup> nucleus | 2 <sup>nd</sup> nucleus | 1 <sup>st</sup> nucleus | 2 <sup>nd</sup> nucleus |
|-------------------------|-------------------------|-------------------------|-------------------------|-------------------------|-------------------------|-------------------------|-------------------------|
| L23CB                   | Y26CZ                   | L40CD1                  | G43N                    | E50N                    | S52CB                   | W60CD1                  | F62CD2                  |
| L23CD2                  | Y26CZ                   | L40CG                   | G43N                    | E50CA                   | S52N                    | W60CD2                  | F62CD2                  |
| L23CA                   | Y26CA                   | L40CD1                  | E44N                    | E50CB                   | D53CA                   | W60CE3                  | F62CD2                  |
| L23CA                   | Y26CE1                  | L40CD1                  | E44CG                   | S52N                    | L54CG                   | W60CE2                  | F62CD2                  |
| L23CB                   | Y26CG                   | K41CA                   | G43CA                   | S52CB                   | L54CB                   | W60CE2                  | Y63CA                   |
| L23CA                   | C25CB                   | K41C                    | G43CA                   | S52CA                   | L54CB                   | W60CE2                  | Y63CB                   |
| N24CB                   | Y26CG                   | N42CB                   | R45CA                   | S52CB                   | L54CD2                  | S61CB                   | Y63CB                   |
| C25CB                   | V27CG2                  | N42CB                   | E44CA                   | S52CB                   | L54N                    | S61CB                   | L64CA                   |
| Y26CG                   | S28CA                   | E44CB                   | I46CB                   | S52CB                   | L54CD1                  | F62CG                   | L64CB                   |
| V27C                    | G29CA                   | E44CA                   | I46CD1                  | S52CB                   | L54CA                   | F62CB                   | L64CA                   |
| V27CG1                  | F30CD2                  | E44CA                   | I46CG2                  | S52CA                   | L54CD2                  | F62CB                   | L64CD1                  |
| G29CA                   | H31CA                   | E44CG                   | I46CD1                  | S52CB                   | S55CB                   | F62CG                   | L65CG                   |
| G29CA                   | P32CD                   | E44CB                   | I46CA                   | D53CA                   | S55CB                   | Y63CZ                   | Y66CA                   |
| F30CB                   | P32CA                   | E44CB                   | I46CD1                  | L54CA                   | S57CB                   | Y63CZ                   | Y66CB                   |
| F30CG                   | P32CB                   | E44CB                   | I46CG2                  | L54CD1                  | F56CB                   | L64CA                   | T68CB                   |
| F30CG                   | P32CD                   | I46CD1                  | V49CB                   | L54CB                   | F56CA                   | L64CG                   | Y66CB                   |
| F30CG                   | P32CG                   | I46CD1                  | V49CG1                  | L54CD1                  | F56CG                   | L64CA                   | Y66CB                   |
| F30CA                   | P32CA                   | I46CG2                  | K48CA                   | L54CB                   | F56CB                   | L64CG                   | Y66CA                   |
| F30CG                   | P32CA                   | I46CG2                  | V49CB                   | S55CB                   | K58CA                   | L64CD1                  | Y66CB                   |
| F30CA                   | P32CB                   | I46CG2                  | V49CG1                  | S55CB                   | K58CD                   | L65CA                   | T68CB                   |
| F30CA                   | P32CD                   | I46CB                   | K48CG                   | S55CB                   | S57CA                   | L65CB                   | T68CB                   |
| F30CE1                  | P32CG                   | I46CB                   | V49CG1                  | S55CB                   | K58CB                   | L65CD1                  | T68CG2                  |
| F30CA                   | D34CB                   | I46CG1                  | V49CG1                  | F56CA                   | W60CG                   | L65CD2                  | T68CG2                  |
| F30CB                   | P32CB                   | I46CG1                  | V49CB                   | F56CB                   | W60CE3                  | L65CD1                  | T68CB                   |
| F30CB                   | P32CG                   | I46CA                   | K48CG                   | F56CB                   | W60CG                   | L65CD2                  | T68CB                   |
| H31C                    | S33CA                   | I46CB                   | V49CB                   | F56CB                   | W60CB                   | L65CG                   | T68CA                   |
| H31C                    | S33C                    | I46CA                   | V49CG1                  | F56CA                   | W60CH2                  | L65CG                   | T68CB                   |
| H31CE1                  | D34CA                   | I46CG2                  | K48N                    | F56CA                   | K58CA                   | L65CB                   | T68CG2                  |
| H31CE1                  | D34CB                   | I46CG2                  | K48CB                   | F56CG                   | K58CA                   | L65CD2                  | Y67CA                   |
| H31C                    | D34CB                   | I46CG2                  | K48CD                   | F56CG                   | W60CA                   | L65CG                   | T68CG2                  |
| H31CD2                  | D34CA                   | I46CA                   | K48CA                   | F56CG                   | W60CD2                  | L65CA                   | T68CG2                  |
| H31CA                   | S33CB                   | I46CA                   | K48CB                   | F56CG                   | W60CH2                  | L65CD2                  | T68CA                   |
| H31C                    | S33CB                   | I46CB                   | K48CA                   | F56CA                   | W60CE3                  | Y66C                    | T68CB                   |
| P32CB                   | D34CA                   | I46CA                   | K48CD                   | F56CB                   | W60CD1                  | T68CG2                  | F70CB                   |
| P32CG                   | D34CB                   | E47CG                   | V49CG1                  | F56CA                   | W60CE2                  | T68CB                   | T71C                    |
| S33N                    | I35CA                   | E47CB                   | V49CG1                  | F56CB                   | W60CD2                  | T68CB                   | F70CD2                  |
| S33CB                   | I35CA                   | V49CA                   | S52CB                   | F56CB                   | W60CE2                  | T68CB                   | F70CE1                  |
| D34CA                   | V37CG2                  | V49CB                   | S52CA                   | S57CA                   | W60CA                   | E69CA                   | P72CA                   |
| I35CD1                  | V37CA                   | V49CB                   | S52CB                   | S57CB                   | D59CA                   | E69CB                   | T71CB                   |
| I35CD1                  | V37CG1                  | V49CG1                  | S52CA                   | S57N                    | W60CB                   | F70CB                   | P72CG                   |
| I35CG2                  | V37CB                   | V49CG1                  | S52CB                   | S57CB                   | W60CD1                  | F70CA                   | T73CG2                  |
| I35CG2                  | V37CG1                  | V49CA                   | S52CA                   | S57CB                   | D59CB                   | F70CG                   | P72CD                   |
| I35CG2                  | V37CG2                  | V49CA                   | S52N                    | D59CA                   | S61CB                   | F70CA                   | P72CB                   |
| I35CG1                  | V37N                    | V49CG1                  | S52N                    | W60CA                   | F62CB                   | F70CB                   | P72CA                   |
| D38CA                   | K41CA                   | V49CG1                  | D53CA                   | W60CD1                  | F62CA                   | F70CD2                  | P72CA                   |
| L40CB                   | G43CA                   | V49CG1                  | D53CB                   | W60CG                   | F62CA                   | F70CE1                  | P72CA                   |
| L40CD1                  | N42CB                   | V49CG1                  | H51CD2                  | W60CD1                  | F62CB                   | F70CE1                  | P72CB                   |
| L40CD1                  | G43CA                   | E50CA                   | S52CA                   | W60CE3                  | F62CB                   | F70CD2                  | P72CG                   |
| L40CG                   | G43CA                   | E50CA                   | S52CB                   | W60CA                   | F62CG                   | F70CD2                  | T73CB                   |
| L40CA                   | N42N                    | E50CB                   | S52CA                   | W60CH2                  | F62CA                   | P72CA                   | E74CD                   |
| L40CB                   | N42N                    | E50CB                   | S52CB                   | W60CE2                  | F62CA                   | T73CB                   | K75CD                   |
| L40CA                   | G43N                    | E50C                    | S52CB                   | W60CE2                  | F62CB                   | T73CB                   | K75CA                   |
| L40CB                   | G43N                    | E50C                    | S52CA                   | W60CB                   | F62CB                   | E74CB                   | D76CB                   |



| 1 <sup>st</sup> nucleus | 2 <sup>nd</sup> nucleus |
|-------------------------|-------------------------|
| E74CB                   | D76CA                   |
| K75CD                   | E77CD                   |
| K75CE                   | E77CB                   |
| D76CB                   | Y78CA                   |
| D76CA                   | Y78CD1                  |
| E77CB                   | A79CA                   |
| Y78CZ                   | C80CA                   |
| Y78CZ                   | C80CB                   |
| Y78CE1                  | C80CA                   |
| Y78CG                   | C80CA                   |
| Y78CE1                  | C80CB                   |
| A79CA                   | R81CB                   |
| A79CA                   | R81CD                   |
| C80CB                   | V82CA                   |
| C80CB                   | V82CG1                  |
| C80CB                   | V82CG2                  |
| R81CD                   | N83CA                   |

**Supplementary Table 5: Inter-nuclear contacts between atoms within amino acid residues that are far apart in the primary sequence (within >5 residues), observed by MAS-NMR spectroscopy. Contacts coloured RED in Figure 3e.**

| 1 <sup>st</sup> nucleus | 2 <sup>nd</sup> nucleus | 1 <sup>st</sup> nucleus | 2 <sup>nd</sup> nucleus | 1 <sup>st</sup> nucleus | 2 <sup>nd</sup> nucleus |
|-------------------------|-------------------------|-------------------------|-------------------------|-------------------------|-------------------------|
| L23N                    | V85CG1                  | I35CD1                  | L64CA                   | I46CD1                  | L54CG                   |
| L23N                    | V85CG2                  | I35CD1                  | L64CD1                  | I46CG1                  | S52CB                   |
| N24CA                   | V82CG1                  | I35CD1                  | L64CG                   | I46CG1                  | L54CB                   |
| N24CB                   | V82CG1                  | I35CD1                  | L65CB                   | I46CG2                  | L54CB                   |
| N24CA                   | V82CG2                  | I35CD1                  | F70CB                   | I46CG2                  | L54CD2                  |
| N24CB                   | V82CG2                  | I35CG2                  | L64CA                   | I46CG2                  | L54CG                   |
| N24N                    | V82CG1                  | I35CG2                  | L64CB                   | I46CG1                  | L54CG                   |
| N24N                    | V82CG2                  | I35CG2                  | L64CD1                  | I46CA                   | L54CG                   |
| N24ND2                  | V82CG1                  | I35CG2                  | L64CG                   | I46CB                   | L54CG                   |
| N24ND2                  | V82CG2                  | I35CG2                  | L65CD2                  | I46CA                   | L54CD1                  |
| N24CA                   | C80CB                   | I35CG2                  | F70CB                   | I46N                    | L54CG                   |
| N24CB                   | V85CG1                  | I35CD1                  | L65CD1                  | I46CG1                  | L54CA                   |
| C25CB                   | C80CA                   | I35CG2                  | L65CA                   | I46CG2                  | S52CB                   |
| C25CB                   | C80CB                   | I35CA                   | L64CD1                  | I46CA                   | L54CA                   |
| C25CB                   | V82CA                   | I35CG1                  | L65CD1                  | I46CG1                  | L54CD2                  |
| C25CB                   | V82CG1                  | I35CA                   | L65CG                   | V49CG1                  | L54CB                   |
| C25N                    | C80CB                   | I35CG1                  | L64CD1                  | V49CG1                  | L54CD2                  |
| C25N                    | V82CG1                  | I35CG2                  | F70CD2                  | V49CG1                  | L54CG                   |
| C25N                    | V82CG2                  | V37CG2                  | F62CG                   | V49CB                   | L54CD2                  |
| C25CB                   | C80N                    | V37CG1                  | L64CD2                  | V49CA                   | L54CD1                  |
| C25CA                   | C80CB                   | V37CG2                  | L64CD2                  | V49CA                   | L54CG                   |
| C25CB                   | V82CG2                  | V37CB                   | L64CD2                  | V49CB                   | L54CA                   |
| C25CB                   | R81CA                   | V37CG1                  | L64CD1                  | V49CB                   | L54CB                   |
| C25CB                   | Y78CD1                  | V37CG2                  | L64CG                   | V49CB                   | L54CD1                  |
| C25CB                   | A79CA                   | V37CA                   | L64CD1                  | V49CB                   | L54CG                   |
| Y26CB                   | Y78CZ                   | V37CG1                  | L64CA                   | V49CG1                  | L54CA                   |
| V27CA                   | Y78CB                   | V37CG2                  | L64CA                   | V49CG1                  | L54CD1                  |
| V27CG1                  | Y78CE1                  | V37CG1                  | F62CD2                  | V49CA                   | L54CA                   |
| V27CA                   | Y78CG                   | V37CB                   | F62CB                   | V49CA                   | L54CD2                  |
| V27CB                   | Y78CG                   | V37CB                   | L64CA                   | V49N                    | L54CB                   |
| V27CG2                  | Y78CG                   | V37CG1                  | W60CD1                  | Y63CB                   | T68CB                   |
| V27CG1                  | Y78CD2                  | V37CG1                  | W60CE2                  | L65CD2                  | F70CB                   |
| F30CA                   | Y78CG                   | V37CG2                  | F62CB                   | L65CB                   | F70CG                   |
| F30CG                   | Y78CB                   | V37CG2                  | F62CD1                  | L65CD1                  | F70CB                   |
| F30CG                   | Y78CE1                  | V37CG2                  | F62CD2                  | L65CA                   | F70CD2                  |
| F30CG                   | Y78CG                   | L39CD2                  | W60CB                   | L65CD1                  | F70CD2                  |
| F30CE1                  | Y78CA                   | L39CB                   | W60CG                   | L65CD2                  | F70CD2                  |
| F30CB                   | Y78CD1                  | L39CA                   | W60CD2                  | L65CG                   | F70CE1                  |
| H31CA                   | E36CG                   | L39CB                   | W60CD2                  |                         |                         |
| H31CE1                  | E36CA                   | L39CG                   | W60CD2                  |                         |                         |
| H31C                    | D76CG                   | L39CB                   | W60CB                   |                         |                         |
| P32CA                   | D76CB                   | L39CD1                  | W60CD1                  |                         |                         |
| P32CB                   | D76CB                   | L39CD1                  | W60CE2                  |                         |                         |
| P32CG                   | D76CA                   | L39CD1                  | W60CE3                  |                         |                         |
| P32CD                   | Y78CG                   | L40CD1                  | F56CG                   |                         |                         |
| P32CA                   | D76CA                   | L40CA                   | F56CE1                  |                         |                         |
| P32CG                   | D76CB                   | L40CG                   | F56CE1                  |                         |                         |
| P32CB                   | D76CA                   | L40CD1                  | F56CB                   |                         |                         |
| P32CD                   | T73CB                   | R45CA                   | L54CD2                  |                         |                         |
| S33CB                   | T73CA                   | I46CA                   | L54CB                   |                         |                         |
| S33CB                   | D76CB                   | I46CB                   | L54CB                   |                         |                         |
| S33CB                   | T71CB                   | I46CD1                  | L54CB                   |                         |                         |
| S33CB                   | T73CB                   | I46CD1                  | L54CD2                  |                         |                         |

**Supplementary Table 6: Analysis of energetic contributions of  $\pi$ -stacking to the  $\beta_2m$  fibril structure**

| <b>Bond</b>   | <b>Face centres distance (Å)</b> | <b>Subunit Contribution (kcal/mol)*</b> | <b>Fibril level contribution (kcal/mol/<math>\mu</math>m)*</b> |
|---------------|----------------------------------|-----------------------------------------|----------------------------------------------------------------|
| A.Y63 – A.Y66 | 4.8                              | -0.9                                    | -1863                                                          |
| A.Y66 – A.Y67 | 4.8                              | -0.9                                    | -1863                                                          |
| A.Y67 – B.Y67 | 7.4                              | -0.06                                   | -124                                                           |
| B.Y66 – B.Y67 | 4.8                              | -0.9                                    | -1863                                                          |
| B.Y63 – B.Y66 | 4.8                              | -0.9                                    | -1863                                                          |

\* Estimated based on ring centre distance and data from<sup>6</sup>. Each protofilament within the two-protofilament fibrils is named A or B.

**Supplementary Table 7 – Comparison of intrasubunit and interprotofilament interactions in selected amyloid fibril structures in the pdb.**

| Protein                                | Tau             | Tau             | Tau             | $\alpha$ -syn   | $\alpha$ -syn   | $\alpha$ -syn    | $\beta_2$ m     | A $\beta_{1-42}$  | A $\beta_{1-42}$  | A $\beta_{1-42}$ | A $\beta_{1-40}$  | A $\beta_{1-40}$  | A $\beta_{1-40}$  |
|----------------------------------------|-----------------|-----------------|-----------------|-----------------|-----------------|------------------|-----------------|-------------------|-------------------|------------------|-------------------|-------------------|-------------------|
| PDB                                    | 5o3l            | 503t            | 6gx5            | 6flt            | 6a6b            | 2n0a             | Xxxx            | 5kk3              | 2nao              | 5oqv             | 2lmo              | 2m4j              | 2mvx              |
| Method                                 | EM <sup>5</sup> | EM <sup>5</sup> | EM <sup>7</sup> | EM <sup>8</sup> | EM <sup>9</sup> | NMR <sup>3</sup> | EM <sup>a</sup> | NMR <sup>10</sup> | NMR <sup>11</sup> | EM <sup>12</sup> | NMR <sup>13</sup> | NMR <sup>14</sup> | NMR <sup>15</sup> |
| <b>Intrasubunit interactions</b>       |                 |                 |                 |                 |                 |                  |                 |                   |                   |                  |                   |                   |                   |
| Hydrophobic packing                    | X               | X               | X               | X               | X               | X                | X               | X                 | X                 | X                |                   | X                 | X                 |
| Steric zippers                         | X               | X               |                 | X               | X               | X                | X               | X                 | X                 | X                |                   | X                 |                   |
| Salt Bridges                           | X               | X               | X               | X               | X               | X                |                 |                   |                   |                  |                   | X                 | X                 |
| $\pi$ -stacking                        |                 |                 | X               |                 |                 |                  | X               |                   |                   |                  |                   |                   |                   |
| $\beta$ -helix                         | X               | X               |                 |                 |                 |                  |                 |                   |                   |                  |                   |                   |                   |
| Disulfide                              |                 |                 |                 |                 |                 |                  | X               |                   |                   |                  |                   |                   |                   |
| Disordered termini                     | X               | X               | X               | X               | X               | X                | X               |                   |                   |                  |                   |                   |                   |
| <b>Interprotofilament interactions</b> |                 |                 |                 |                 |                 |                  |                 |                   |                   |                  |                   |                   |                   |
| In register                            |                 | X               |                 |                 |                 |                  | X               |                   |                   |                  |                   | X                 | X                 |
| Screw axis                             | X               |                 |                 | X               | X               |                  |                 | X                 | X                 | X                | X                 |                   |                   |
| Steric zipper                          |                 |                 |                 | X               | X               |                  |                 |                   |                   | X                |                   |                   |                   |
| Backbone H-bonding                     | X               |                 | ?               |                 |                 |                  |                 |                   |                   |                  |                   |                   |                   |
| Terminus salt bridge                   |                 |                 |                 |                 |                 |                  |                 |                   |                   | X                |                   |                   |                   |
| Disordered termini                     | X               | X               |                 | X               | X               | n/a <sup>b</sup> | X               |                   |                   |                  |                   |                   |                   |
| Side chain H-bonding                   |                 |                 |                 | X               | X               |                  | X               |                   |                   |                  |                   |                   |                   |
| $\pi$ -stacking                        |                 |                 |                 |                 |                 |                  | X               |                   |                   |                  |                   |                   |                   |
| Terminus coordination                  |                 | X               |                 |                 |                 |                  |                 |                   |                   |                  |                   |                   |                   |
| Hydrophobic packing                    |                 |                 | X               |                 |                 |                  |                 | X                 | X                 |                  | X                 | X                 | X                 |

<sup>a</sup> This study

<sup>b</sup> Single protofilament structure

**Supplementary Table 8: Numbers of multiple ring face to face  $\pi$ -stacking interactions identified in the pdb**

| <b>rings involved</b> | <b>Count in pdb (of 136,162)</b> |
|-----------------------|----------------------------------|
| 3                     | 4937                             |
| 4                     | 521                              |
| 5                     | 49                               |
| 6                     | 7                                |
| 7                     | 3                                |

**Supplementary Table 9: Face to face  $\pi$ -stacking interactions involving 5 or more rings found in the pdb**

| <b>PDB</b> | <b>Type</b>    | <b>Description</b>                                                      |
|------------|----------------|-------------------------------------------------------------------------|
| 2f9c       | $\beta$ -helix | YDCK from <i>Salmonella cholerae</i> .                                  |
| 2o0w       | $\beta$ -helix | Pectate lyase                                                           |
| 2o0v       | $\beta$ -helix | Pectate lyase                                                           |
| 2xtw       | $\beta$ -helix | QnrB1                                                                   |
| 2xty       | $\beta$ -helix | QnrB2                                                                   |
| 2nzm       | $\beta$ -helix | <i>Bacillus subtilis</i> pectate lyase                                  |
| 5ols       | $\beta$ -helix | Rhamnogalacturonan lyase                                                |
| 4fs7       | $\beta$ -helix | leucine-rich repeat protein from <i>Bacteroides ovatus</i>              |
| 2bsp       | $\beta$ -helix | <i>Bacillus subtilis</i> pectate lyase                                  |
| 2pig       | $\beta$ -helix | ydck from <i>Salmonella cholerae</i>                                    |
| 1idj       | $\beta$ -helix | Pectin lyase A                                                          |
| 1bn8       | $\beta$ -helix | <i>Bacillus subtilis</i> pectate lyase                                  |
| 3krq       | $\beta$ -helix | pectate lyase                                                           |
| 2o1d       | $\beta$ -helix | Pectate lyase bound to trisaccharide                                    |
| 2xtx       | $\beta$ -helix | QnrB1                                                                   |
| 4h09       | $\beta$ -helix | leucine-rich repeat protein from <i>Eubacterium ventriosum</i>          |
| 1vbl       | $\beta$ -helix | pectate lyase PL 47                                                     |
| 3pr7       | $\beta$ -helix | <i>Moraxella catarrhalis</i> adhesin UspA1                              |
| 1dbo       | $\beta$ -helix | chondroitinase B                                                        |
| 1dbg       | $\beta$ -helix | chondroitinase B                                                        |
| 4gt6       | $\beta$ -helix | leucine rich cell surface protein                                       |
| 1ofl       | $\beta$ -helix | chondroitinase B                                                        |
| 1ofm       | $\beta$ -helix | chondroitinase B                                                        |
| 5olq       | $\beta$ -helix | rhamnogalacturonan lyase                                                |
| 5olr       | $\beta$ -helix | rhamnogalacturonan lyase                                                |
| 2xt2       | $\beta$ -helix | AlbG                                                                    |
| 2lmn       | fibril z-axis  | A $\beta$ 1-40                                                          |
| 5o3t       | fibril z-axis  | Straight filament in Alzheimer's disease brain                          |
| 5o3l       | fibril z-axis  | Paired helical filament in Alzheimer's disease brain                    |
| 2mvx       | fibril z-axis  | A $\beta$ 1-420 fibrils: the Osaka mutation                             |
| 2beg       | fibril z-axis  | A $\beta$ 1-42                                                          |
| 5oqv       | fibril z-axis  | A $\beta$ 1-42                                                          |
| 5o3o       | fibril z-axis  | Tau EM                                                                  |
| 2mxu       | fibril z-axis  | A $\beta$ 1-42                                                          |
| 5kk3       | fibril z-axis  | A $\beta$ 1-42                                                          |
| 2m5n       | fibril z-axis  | transthyretin fibrils                                                   |
| 5w3n       | fibril z-axis  | FUS low sequence complexity domain protein fibrils                      |
| 2mpz       | fibril z-axis  | A $\beta$ D23N                                                          |
| 2n0a       | fibril z-axis  | $\alpha$ -synuclein                                                     |
| 1il5       | Lectin-like    | ricin A chain bound with inhibitor                                      |
| 1v6n       | Lectin-like    | Peanut lectin with 9mer peptide                                         |
| 1ioa       | Lectin-like    | Arcelin-5, a lectin-like defense protein from <i>Phaseolus vulgaris</i> |
| 1j1m       | Lectin-like    | Ricin A-Chain (recombinant) at 100K                                     |
| 5kxc       | Lectin-like    | <i>Wisteria floribunda</i> lectin                                       |

|      |             |                                                                      |
|------|-------------|----------------------------------------------------------------------|
| 1qdo | Lectin-like | Man( $\alpha$ 1-3)man( $\alpha$ 1-O)methyl concanavilin A complex    |
| 1cr7 | Lectin-like | Peanut lectin-lactose complex monoclinic form                        |
| 5clw | Lectin-like | human glycogen branching enzyme in complex with<br>maltoheptaose     |
| 1pv6 | Lectin-like | lactose permease                                                     |
| 1n47 | Lectin-like | solectin B4 from <i>Vicia villosa</i> in complex with the Tn antigen |
| 5sv3 | Lectin-like | RTA1-33/44-198 (RVEC)                                                |
| 4lgp | Lectin-like | ricin A chain bound to camelid nanobody                              |
| 1br5 | Lectin-like | ricin A chain (recombinant) complex with neopterin                   |
| 3nrb | unique      | formyltetrahydrofolate deformylase                                   |

**Supplementary Table 10: NMR acquisition parameters for  $\beta_2m$  fibrils**

3D NCACX, 3D NCOCX, and 3D CONCA spectra (Cambridge Instruments 750 MHz, operating under RNMR<sup>16-20</sup>; courtesy of Dr. David Ruben). DARR<sup>21</sup> mixing was used for the 3D NCACX ( $\tau_{\text{mix}} = 60$  ms) and 3D NCOCX ( $\tau_{\text{mix}} = 80$  ms). Additionally, 3D NNC <sup>$\alpha$</sup>  experiments were acquired (Bruker 800 & 900 AVANCE III, with a 3.2 mm triple channel HCN Bruker probe<sup>22</sup>). Spectra were recorded at  $\omega_r/2\pi = 20$  kHz and regulated to  $\pm 10$  Hz using a Bruker MAS II controller. The 15 ms <sup>15</sup>N-<sup>15</sup>N PAR mixing used radio frequency (RF) fields of  $\omega_{1H}/2\pi = 55.4$  kHz and  $\omega_{15N}/2\pi = 32.2$  kHz. Spectra at  $\omega_{0H}/2\pi = 750$  MHz were processed with NMRPipe<sup>23</sup>, while those at  $\omega_{0H}/2\pi = 800/900$  MHz were processed using TopSpin 3.2. All spectra were analysed in Sparky<sup>24</sup>. <sup>13</sup>C and <sup>15</sup>N chemical shifts were referenced using the published shifts of adamantane relative to DSS for <sup>13</sup>C referencing and the IUPAC relative frequency ratios between DSS (<sup>13</sup>C) and liquid ammonia (<sup>15</sup>N)<sup>25</sup>. All experiments were conducted at 268 K

| Experiment                                                                | Labelling                                                         | T [K] | B <sub>0</sub> [T] | ns   | $\omega_r$ [kHz] | d1 [s] | $\tau_{\text{mix}}$ [ms] | t <sub>1</sub> | sw <sub>1</sub> [Hz] | $\omega_1$ [Hz] | t <sub>2</sub> | sw <sub>2</sub> [Hz] | $\omega_2$ [Hz] | t <sub>3</sub> | sw <sub>3</sub> [Hz] | $\omega_3$ [Hz] |
|---------------------------------------------------------------------------|-------------------------------------------------------------------|-------|--------------------|------|------------------|--------|--------------------------|----------------|----------------------|-----------------|----------------|----------------------|-----------------|----------------|----------------------|-----------------|
| 3D [ <sup>15</sup> N, <sup>13</sup> C]-NCACX                              | [u- <sup>13</sup> C, u- <sup>15</sup> N]                          | 268   | 17.6               | 16   | 12.5             | 2.5    | 80                       | 3072           | 100000.00            | 7524.08         | 96             | 4166.70              | 8338.11         | 176            | 12500.00             | 7524.08         |
| 3D [ <sup>15</sup> N, <sup>13</sup> C]-NCOCX                              | [u- <sup>13</sup> C, u- <sup>15</sup> N]                          | 268   | 17.6               | 16   | 12.5             | 2.5    | 60                       | 2048           | 100000.00            | 30660.95        | 128            | 4166.70              | 8338.22         | 176            | 6250.00              | 30660.95        |
| 3D [ <sup>15</sup> N, <sup>13</sup> C]-CONCA                              | [u- <sup>13</sup> C, u- <sup>15</sup> N]                          | 268   | 17.6               | 16   | 12.5             | 2.5    | -                        | 3072           | 83333.30             | 30848.40        | 128            | 6250.00              | 8717.12         | 128            | 4166.70              | 30848.40        |
| 3D [ <sup>15</sup> N, <sup>13</sup> C]-NNC <sup><math>\alpha</math></sup> | [u- <sup>13</sup> C, u- <sup>15</sup> N]                          | 268   | 18.8               | 64   | 20.0             | 3.0    | 15                       | 1398           | 43859.65             | 12059.50        | 48             | 2916.19              | 9516.96         | 48             | 2916.19              | 9516.96         |
| 2D [ <sup>13</sup> C, <sup>13</sup> C]-RFDR                               | [u- <sup>13</sup> C, u- <sup>15</sup> N]                          | 268   | 21.1               | 32   | 20.0             | 2.6    | 1.6                      | 3072           | 83333.34             | 10638.97        | 1152           | 50000.00             | 10638.97        | -              | -                    | -               |
| 2D [ <sup>13</sup> C, <sup>13</sup> C]-PDSO                               | [u- <sup>13</sup> C, u- <sup>15</sup> N]                          | 268   | 21.1               | 40   | 16.0             | 2.3    | 600                      | 2400           | 55555.56             | 20370.41        | 1200           | 55558.22             | 20370.41        | -              | -                    | -               |
| 2D [ <sup>13</sup> C, <sup>13</sup> C]-PAR                                | [u- <sup>13</sup> C, u- <sup>15</sup> N]                          | 268   | 21.1               | 96   | 20.0             | 2.4    | 15                       | 3072           | 83333.34             | 11248.99        | 1536           | 50000.06             | 11248.99        | -              | -                    | -               |
| 2D [ <sup>13</sup> C, <sup>15</sup> N]-PAIN                               | [u- <sup>13</sup> C, u- <sup>15</sup> N]                          | 268   | 21.1               | 1120 | 16.0             | 2.6    | 12                       | 2560           | 83333.34             | 12467.82        | 192            | 10000.00             | 10948.32        | -              | -                    | -               |
| 2D [ <sup>13</sup> C, <sup>13</sup> C]-RFDR                               | [1,6- <sup>13</sup> C <sub>2</sub> -glucose, u- <sup>15</sup> N]  | 268   | 18.8               | 64   | 20.0             | 2.5    | 1.6                      | 3072           | 71428.57             | 20099.17        | 1024           | 40000.00             | 20099.17        | -              | -                    | -               |
| 2D [ <sup>13</sup> C, <sup>13</sup> C]-PDSO                               | [1,6- <sup>13</sup> C <sub>2</sub> -glucose, u- <sup>15</sup> N]  | 268   | 18.8               | 176  | 20.0             | 1.0    | 1000                     | 2048           | 62500.00             | 19094.21        | 512            | 40000.00             | 19094.21        | -              | -                    | -               |
| 2D [ <sup>13</sup> C, <sup>13</sup> C]-PAR                                | [1,6- <sup>13</sup> C <sub>2</sub> -glucose, u- <sup>15</sup> N]  | 268   | 21.1               | 144  | 20.0             | 2.4    | 15                       | 3072           | 83333.34             | 9528.82         | 1228           | 49999.68             | 9528.82         | -              | -                    | -               |
| 2D [ <sup>13</sup> C, <sup>15</sup> N]-PAIN                               | [1,6- <sup>13</sup> C <sub>2</sub> -glucose, u- <sup>15</sup> N]  | 268   | 21.1               | 1056 | 20.0             | 2.6    | 16                       | 3072           | 83333.34             | 9053.00         | 196            | 10000.00             | 11447.00        | -              | -                    | -               |
| 2D [ <sup>13</sup> C, <sup>13</sup> C]-RFDR                               | [1,3- <sup>13</sup> C <sub>2</sub> -glycerol, u- <sup>15</sup> N] | 268   | 17.6               | 40   | 18.2             | 2.7    | 1.76                     | 4096           | 83333.30             | 18000.00        | 1080           | 35714.3              | 18000.00        | -              | -                    | -               |
| 2D [ <sup>13</sup> C, <sup>13</sup> C]-PDSO                               | [1,3- <sup>13</sup> C <sub>2</sub> -glycerol, u- <sup>15</sup> N] | 268   | 17.6               | 64   | 12.5             | 2.6    | 500                      | 4096           | 83333.30             | 16000.00        | 1024           | 44642.9              | 16000.00        | -              | -                    | -               |
| 2D [ <sup>13</sup> C, <sup>13</sup> C]-PAR                                | [1,3- <sup>13</sup> C <sub>2</sub> -glycerol, u- <sup>15</sup> N] | 268   | 21.1               | 96   | 20.0             | 2.4    | 15                       | 3072           | 83333.34             | 9528.82         | 1228           | 49999.68             | 9528.82         | -              | -                    | -               |
| 2D [ <sup>13</sup> C, <sup>15</sup> N]-PAIN                               | [1,3- <sup>13</sup> C <sub>2</sub> -glycerol, u- <sup>15</sup> N] | 268   | 21.1               | 960  | 20.0             | 2.6    | 12                       | 3072           | 83333.34             | 9053.00         | 196            | 10000.00             | 11493.85        | -              | -                    | -               |
| 2D [ <sup>13</sup> C, <sup>13</sup> C]-PDSO                               | [2- <sup>13</sup> C-glycerol, u- <sup>15</sup> N]                 | 268   | 17.6               | 160  | 16.7             | 2.4    | 700                      | 4096           | 83333.30             | 18000.00        | 880            | 35211.30             | 18000.00        | -              | -                    | -               |
| 2D [ <sup>13</sup> C, <sup>13</sup> C]-PAR                                | [2- <sup>13</sup> C-glycerol, u- <sup>15</sup> N]                 | 268   | 21.1               | 240  | 20.0             | 2.4    | 18                       | 3072           | 83333.34             | 11248.99        | 1536           | 50000.06             | 11248.99        | -              | -                    | -               |
| 2D [ <sup>13</sup> C, <sup>15</sup> N]-PAIN                               | [2- <sup>13</sup> C-glycerol, u- <sup>15</sup> N]                 | 268   | 21.1               | 896  | 16.0             | 2.6    | 12                       | 3072           | 83333.34             | 9053.00         | 196            | 10000.00             | 11447.00        | -              | -                    | -               |
| 2D [ <sup>13</sup> C, <sup>13</sup> C]-RFDR                               | [ <sup>13</sup> C-VYL, u- <sup>15</sup> N]                        | 268   | 21.1               | 32   | 16.0             | 2.5    | 2                        | 3072           | 83333.34             | 9053.00         | 340            | 14716.70             | 9053.00         | -              | -                    | -               |
| 2D [ <sup>13</sup> C, <sup>13</sup> C]-PDSO                               | [ <sup>13</sup> C-VYL, u- <sup>15</sup> N]                        | 268   | 17.6               | 240  | 16.0             | 2.5    | 200                      | 4096           | 83333.30             | 18000.00        | 800            | 33783.80             | 18000.00        | -              | -                    | -               |
| 2D [ <sup>13</sup> C, <sup>13</sup> C]-PAR                                | [ <sup>13</sup> C-VYL, u- <sup>15</sup> N]                        | 268   | 21.1               | 96   | 16.0             | 2.5    | 15                       | 3072           | 83333.34             | 9053.00         | 340            | 14716.70             | 9053.00         | -              | -                    | -               |
| 2D [ <sup>13</sup> C, <sup>15</sup> N]-PAIN                               | [ <sup>13</sup> C-VYL, u- <sup>15</sup> N]                        | 268   | 21.1               | 992  | 16.0             | 2.5    | 8                        | 3072           | 83333.34             | 9053.00         | 196            | 10000.00             | 11448.24        | -              | -                    | -               |



**Supplementary Table 11: NMR processing parameters  $\beta_2m$  fibrils**

The contact information (Supplementary Tables 2-5) were extracted from a total of 19 2D  $^{13}\text{C}$ - $^{13}\text{C}$  and  $^{13}\text{C}$ - $^{15}\text{N}$  correlations. We recorded  $^{13}\text{C}$ - $^{13}\text{C}$ -PDS<sup>26</sup>,  $^{13}\text{C}$ - $^{13}\text{C}$ -PAR<sup>27-29</sup>,  $^{13}\text{C}$ - $^{13}\text{C}$ -RFDR<sup>30,31</sup>, and  $^{13}\text{C}$ - $^{15}\text{N}$ -PAIN<sup>32</sup> spectra on almost all isotopically labelled samples.

| Experiment                                                | Labelling                                                  | SI <sub>1</sub> | WDW <sub>1</sub> | LB <sub>1</sub> [Hz] | GB <sub>1</sub> | SSB <sub>1</sub> | SI <sub>2</sub> | WDW <sub>2</sub> | LB <sub>2</sub> [Hz] | GB <sub>2</sub> | SSB <sub>2</sub> | SI <sub>3</sub> | WDW <sub>3</sub> | LB <sub>3</sub> [Hz] | GB <sub>3</sub> | SSB <sub>3</sub> |
|-----------------------------------------------------------|------------------------------------------------------------|-----------------|------------------|----------------------|-----------------|------------------|-----------------|------------------|----------------------|-----------------|------------------|-----------------|------------------|----------------------|-----------------|------------------|
| 3D [ $^{15}\text{N}$ , $^{13}\text{C}$ ]-NCACX            | [ $u$ - $^{13}\text{C}$ , $u$ - $^{15}\text{N}$ ]          | 8192            | GM               | 50                   | -               | -                | 512             | GM               | 50                   | -               | -                | 512             | GM               | 50                   | -               | -                |
| 3D [ $^{15}\text{N}$ , $^{13}\text{C}$ ]-NCOCX            | [ $u$ - $^{13}\text{C}$ , $u$ - $^{15}\text{N}$ ]          | 8192            | GM               | 50                   | -               | -                | 512             | GM               | 50                   | -               | -                | 512             | GM               | 50                   | -               | -                |
| 3D [ $^{15}\text{N}$ , $^{13}\text{C}$ ]-CONCA            | [ $u$ - $^{13}\text{C}$ , $u$ - $^{15}\text{N}$ ]          | 8192            | GM               | 60                   | -               | -                | 512             | GM               | 55                   | -               | -                | 256             | GM               | 60                   | -               | -                |
| 3D [ $^{15}\text{N}$ , $^{13}\text{C}$ ]-NNC <sup>□</sup> | [ $u$ - $^{13}\text{C}$ , $u$ - $^{15}\text{N}$ ]          | 8192            | GM               | 20                   | 0.03            | -                | 256             | EM               | 50                   | -               | -                | 256             | GM               | 20                   | 0.03            | -                |
| 2D [ $^{13}\text{C}$ , $^{13}\text{C}$ ]-RFDR             | [ $u$ - $^{13}\text{C}$ , $u$ - $^{15}\text{N}$ ]          | 8192            | GM               | 80                   | -               | -                | 4096            | GM               | 80                   | -               | -                | -               | -                | -                    | -               | -                |
| 2D [ $^{13}\text{C}$ , $^{13}\text{C}$ ]-PDS              | [ $u$ - $^{13}\text{C}$ , $u$ - $^{15}\text{N}$ ]          | 8192            | GM               | 80                   | 0.1             | -                | 2048            | GM               | 80                   | 0.1             | -                | -               | -                | -                    | -               | -                |
| 2D [ $^{13}\text{C}$ , $^{13}\text{C}$ ]-PAR              | [ $u$ - $^{13}\text{C}$ , $u$ - $^{15}\text{N}$ ]          | 8192            | GM               | 50                   | 0.1             | -                | 2048            | GM               | 50                   | 0.1             | -                | -               | -                | -                    | -               | -                |
| 2D [ $^{13}\text{C}$ , $^{15}\text{N}$ ]-PAIN             | [ $u$ - $^{13}\text{C}$ , $u$ - $^{15}\text{N}$ ]          | 8192            | GM               | 20                   | 0.03            | -                | 1024            | GM               | 20                   | 0.03            | -                | -               | -                | -                    | -               | -                |
| 2D [ $^{13}\text{C}$ , $^{13}\text{C}$ ]-RFDR             | [1,6- $^{13}\text{C}_2$ -glucose, $u$ - $^{15}\text{N}$ ]  | 8192            | GM               | 50                   | 0.1             | -                | 2048            | GM               | 50                   | 0.1             | -                | -               | -                | -                    | -               | -                |
| 2D [ $^{13}\text{C}$ , $^{13}\text{C}$ ]-PDS              | [1,6- $^{13}\text{C}_2$ -glucose, $u$ - $^{15}\text{N}$ ]  | 8192            | GM               | 20                   | 0.05            | -                | 2048            | GM               | 20                   | 0.05            | -                | -               | -                | -                    | -               | -                |
| 2D [ $^{13}\text{C}$ , $^{13}\text{C}$ ]-PAR              | [1,6- $^{13}\text{C}_2$ -glucose, $u$ - $^{15}\text{N}$ ]  | 8192            | QSINE            | -                    | -               | 3.5              | 2048            | QSINE            | -                    | -               | 3.5              | -               | -                | -                    | -               | -                |
| 2D [ $^{13}\text{C}$ , $^{15}\text{N}$ ]-PAIN             | [1,6- $^{13}\text{C}_2$ -glucose, $u$ - $^{15}\text{N}$ ]  | 8192            | GM               | 80                   | -               | -                | 512             | GM               | 80                   | -               | -                | -               | -                | -                    | -               | -                |
| 2D [ $^{13}\text{C}$ , $^{13}\text{C}$ ]-RFDR             | [1,3- $^{13}\text{C}_2$ -glycerol, $u$ - $^{15}\text{N}$ ] | 8192            | GM               | 80                   | -               | -                | 2048            | GM               | 80                   | -               | -                | -               | -                | -                    | -               | -                |
| 2D [ $^{13}\text{C}$ , $^{13}\text{C}$ ]-PDS              | [1,3- $^{13}\text{C}_2$ -glycerol, $u$ - $^{15}\text{N}$ ] | 8192            | GM               | 80                   | -               | -                | 2048            | GM               | 80                   | -               | -                | -               | -                | -                    | -               | -                |
| 2D [ $^{13}\text{C}$ , $^{13}\text{C}$ ]-PAR              | [1,3- $^{13}\text{C}_2$ -glycerol, $u$ - $^{15}\text{N}$ ] | 8192            | GM               | 80                   | -               | -                | 4096            | GM               | 80                   | -               | -                | -               | -                | -                    | -               | -                |
| 2D [ $^{13}\text{C}$ , $^{15}\text{N}$ ]-PAIN             | [1,3- $^{13}\text{C}_2$ -glycerol, $u$ - $^{15}\text{N}$ ] | 8192            | GM               | 80                   | -               | -                | 512             | GM               | 80                   | -               | -                | -               | -                | -                    | -               | -                |
| 2D [ $^{13}\text{C}$ , $^{13}\text{C}$ ]-PDS              | [2- $^{13}\text{C}$ -glycerol, $u$ - $^{15}\text{N}$ ]     | 8192            | GM               | 80                   | -               | -                | 2048            | GM               | 80                   | -               | -                | -               | -                | -                    | -               | -                |
| 2D [ $^{13}\text{C}$ , $^{13}\text{C}$ ]-PAR              | [2- $^{13}\text{C}$ -glycerol, $u$ - $^{15}\text{N}$ ]     | 8192            | GM               | 80                   | -               | -                | 4096            | GM               | 80                   | -               | -                | -               | -                | -                    | -               | -                |
| 2D [ $^{13}\text{C}$ , $^{15}\text{N}$ ]-PAIN             | [2- $^{13}\text{C}$ -glycerol, $u$ - $^{15}\text{N}$ ]     | 8192            | GM               | 20                   | 0.07            | -                | 1024            | GM               | 20                   | 0.07            | -                | -               | -                | -                    | -               | -                |
| 2D [ $^{13}\text{C}$ , $^{13}\text{C}$ ]-RFDR             | [ $^{13}\text{C}$ -VYL, $u$ - $^{15}\text{N}$ ]            | 8192            | GM               | 80                   | -               | -                | 1024            | GM               | 80                   | -               | -                | -               | -                | -                    | -               | -                |
| 2D [ $^{13}\text{C}$ , $^{13}\text{C}$ ]-PDS              | [ $^{13}\text{C}$ -VYL, $u$ - $^{15}\text{N}$ ]            | 8192            | GM               | 50                   | -               | -                | 2048            | GM               | 50                   | -               | -                | -               | -                | -                    | -               | -                |
| 2D [ $^{13}\text{C}$ , $^{13}\text{C}$ ]-PAR              | [ $^{13}\text{C}$ -VYL, $u$ - $^{15}\text{N}$ ]            | 8192            | GM               | 80                   | -               | -                | 1024            | GM               | 80                   | -               | -                | -               | -                | -                    | -               | -                |
| 2D [ $^{13}\text{C}$ , $^{15}\text{N}$ ]-PAIN             | [ $^{13}\text{C}$ -VYL, $u$ - $^{15}\text{N}$ ]            | 8192            | GM               | 80                   | -               | -                | 512             | GM               | 80                   | -               | -                | -               | -                | -                    | -               | -                |

**Supplementary Table 12: Refinement statistics for the final  $\beta_2m$  two protofilament fibril model**

| Data collection                           | Dataset 1                    | Dataset 2                    |
|-------------------------------------------|------------------------------|------------------------------|
| Micrographs                               | 2019                         | 3530                         |
| Defocus range ( $\mu\text{M}$ )           | -1.75 to -3.75 $\mu\text{m}$ | -1.75 to -3.75 $\mu\text{m}$ |
| Voltage (kV)                              | 300                          | 300                          |
| Exposure time (s)                         | 10                           | 10                           |
| Number of frames                          | 40                           | 40                           |
| Dose/ frame ( $\text{e}^-/\text{\AA}^2$ ) | 1.05                         | 0.89                         |
| Total dose( $\text{e}^-/\text{\AA}^2$ )   | 42.3                         | 35.8                         |
| Pixel size ( $\text{\AA}$ )               | 1.06                         | 1.06                         |
| <b>Refinement statistics</b>              |                              |                              |
| Box size (px)                             | 300                          |                              |
| Box overlap (px)                          | 270                          |                              |
| Individual fibrils                        | 622                          |                              |
| Particles                                 | 11035                        |                              |
| Subunit rise ( $\text{\AA}$ )             | 4.83                         |                              |
| Subunit Twist ( $^\circ$ )                | -0.608                       |                              |
| Resolution ( $\text{\AA}$ )               | 3.9                          |                              |
| B-factor ( $\text{\AA}^2$ )               | -160.013                     |                              |
| <b>Model statistics</b>                   |                              |                              |
| $\beta_2m$ Subunits                       | 8                            |                              |
| Clash score                               | 29.5                         |                              |
| Poor rotomers                             | 0%                           |                              |
| Favored rotomers                          | 90.98%                       |                              |
| Ramachandran outliers                     | 0%                           |                              |
| Ramachandran favored                      | 88.71%                       |                              |
| Molprobit score                           | 2.54                         |                              |
| Bad bonds                                 | 0%                           |                              |
| Bad angles                                | 0%                           |                              |
| Cis prolines                              | 0 / 2                        |                              |
| CaBLAM outliers                           | 4.99%                        |                              |
| CA geometry outliers                      | 0%                           |                              |

## References

1. Lawrence, M.C. & Colman, P.M. Shape complementarity at protein/protein interfaces. *J. Mol. Biol.* **234**, 946-950 (1993).
2. Michel, G. et al. The structure of chondroitin B lyase complexed with glycosaminoglycan oligosaccharides unravels a calcium-dependent catalytic machinery. *J. Biol. Chem.* **279**, 32882-32896 (2004).
3. Tuttle, M.D. et al. Solid-state NMR structure of a pathogenic fibril of full-length human alpha-synuclein. *Nat. Struct. Mol. Biol.* **23**, 409-415 (2016).
4. Ravishankar, R., Thomas, C., Suguna, K., Surolia, A. & Vijayan, M. Crystal structures of the peanut lectin-lactose complex at acidic pH: retention of unusual quaternary structure, empty and carbohydrate bound combining sites, molecular mimicry and crystal packing directed by interactions at the combining site. *Proteins* **43**, 260-270 (2001).
5. Fitzpatrick, A.W.P. et al. Cryo-EM structures of tau filaments from Alzheimer's disease. *Nature* **547**, 185-190 (2017).
6. McGaughey, G., Gagné, M. & Rappé, A.  $\pi$ -stacking interactions: alive and cell in proteins. *J. Biol. Chem.* **273**, 15458-15463 (1998).
7. Falcon, B. et al. Structures of filaments from Pick's disease reveal a novel tau protein fold. *Nature* **561**, 137-140 (2018).
8. Guerrero-Ferreira, R. et al. Cryo-EM structure of alpha-synuclein fibrils. *Elife* **7**, e36402 (2018).
9. Li, Y. et al. Amyloid fibril structure of alpha-synuclein determined by cryo-electron microscopy. *Cell Res* (2018).
10. Colvin, M.T. et al. Atomic resolution structure of monomorphic A $\beta$ 42 amyloid fibrils. *J. Am. Chem. Soc.* **138**, 9663-9674 (2016).
11. Walti, M.A. et al. Atomic-resolution structure of a disease-relevant A $\beta$ (1-42) amyloid fibril. *Proc. Natl. Acad. Sci. USA* **113**, E4976-E4984 (2016).
12. Gremer, L. et al. Fibril structure of amyloid- $\beta$ (1-42) by cryo-electron microscopy. *Science* **358**, 116-119 (2017).
13. Paravastu, A.K., Leapman, R.D., Yau, W.-M. & Tycko, R. Molecular structural basis for polymorphism in Alzheimer's  $\beta$ -amyloid fibrils. *Proc. Natl. Acad. Sci. USA* **105**, 18349-18354 (2008).
14. Lu, J.X. et al. Molecular structure of  $\beta$ -amyloid fibrils in Alzheimer's disease brain tissue. *Cell* **154**, 1257-1268 (2013).
15. Schutz, A.K. et al. Atomic-resolution three-dimensional structure of amyloid beta fibrils bearing the Osaka mutation. *Angew. Chem. Int. Ed. Engl.* **54**, 331-335 (2015).
16. Igumenova, T.I., Wand, A.J. & McDermott, A.E. Assignment of the backbone resonances for microcrystalline ubiquitin. *J. Am. Chem. Soc.* **126**, 5323-5331 (2004).
17. Marulanda, D. et al. Magic angle spinning solid-state NMR spectroscopy for structural studies of protein interfaces. resonance assignments of differentially enriched *Escherichia coli* thioredoxin reassembled by fragment complementation. *J. Am. Chem. Soc.* **126**, 16608-16620 (2004).
18. Pauli, J., Baldus, M., van Rossum, B., de Groot, H. & Oschkinat, H. Backbone and side-chain  $^{13}\text{C}$  and  $^{15}\text{N}$  signal assignments of the alpha-spectrin SH3 domain by magic angle spinning solid-state NMR at 17.6 Tesla. *Chembiochem* **2**, 272-281 (2001).
19. Shi, L. et al. Three-dimensional solid-state NMR study of a seven-helical integral membrane proton pump-structural insights. *J. Mol. Biol.* **386**, 1078-1093 (2009).
20. Sperling, L.J., Berthold, D.A., Sasser, T.L., Jeisy-Scott, V. & Rienstra, C.M. Assignment strategies for large proteins by magic-angle spinning NMR: the 21-kDa disulfide-bond-forming enzyme DsbA. *J. Mol. Biol.* **399**, 268-282 (2010).
21. Takegoshi, K., Nakamura, S. & Terao, T.  $^{13}\text{C}$ - $^1\text{H}$  dipolar-assisted rotational resonance in magic-angle spinning NMR. *Chem. Phys. Lett.* **344**, 631-637 (2001).

22. Donovan, K.J., Silvers, R., Linse, S. & Griffin, R.G. 3D MAS NMR Experiment utilizing through-space (15)N-(15)N correlations. *J. Am. Chem. Soc.* **139**, 6518-6521 (2017).
23. Delaglio, F. et al. NMRpipe - A multidimensional spectral processing system Based on Unix Pipes. *J. Biomol. NMR* **6**, 277-293 (1995).
24. Goddard, T.D. & Kneller, D.G. Sparky 3. (University of California, San Francisco).
25. Morcombe, C.R. & Zilm, K.W. Chemical shift referencing in MAS solid state NMR. *J. Magn. Reson.* **162**, 479-486 (2003).
26. Bloembergen, N. On the interaction of nuclear spins in a crystalline lattice. *Physica* **XV**, 386-426 (1949).
27. De Paëpe, G., Lewandowski, J.R., Loquet, A., Bockmann, A. & Griffin, R.G. Proton assisted recoupling and protein structure determination. *J. Chem. Phys.* **129**, 245101 (2008).
28. Lewandowski, J.R. et al. Proton assisted recoupling at high spinning frequencies. *J. Phys. Chem. B* **113**, 9062-9069 (2009).
29. Donovan, K.J., Jain, S.K., Silvers, R., Linse, S. & Griffin, R.G. Proton-assisted recoupling (PAR) in peptides and proteins. *J. Phys. Chem. B* **121**, 10804-10817 (2017).
30. Bennett, A.E., Griffin, R.G., Ok, J.H. & Vega, S. Chemical shift correlation spectroscopy in rotating solids: Radio frequency-driven dipolar recoupling and longitudinal exchange. *J. Chem. Phys.* **96**, 8624-8627 (1992).
31. Bennett, A.E. et al. Homonuclear radio frequency-driven recoupling in rotating solids. *J. Chem. Phys.* **108**, 9463-9479 (1998).
32. Lewandowski, J.R., De Paëpe, G. & Griffin, R.G. Proton assisted insensitive nuclei cross polarization. *J. Am. Chem. Soc.* **129**, 728-729 (2007).
