# Supplementary material for: The structure of a β2-microglobulin fibril suggests a molecular basis for its amyloid polymorphism
Source: PubMed Central journal article supplement (PMC6207761; doi:10.1038/s41467-018-06761-6), 2018-10-30
Supplement: 41467_2018_6761_MOESM2_ESM.pdf [file 41467_2018_6761_MOESM2_ESM.pdf]

## Description of Additional Supplementary Files

File Name: Supplementary Movie 1

Description: The 3.9Å structure of a two protofilament  $\beta$ 2m amyloid fibril structure. The two protofilaments are coloured pink and blue, and the fibril rotates around its long axis.

File Name: Supplementary Movie 2

Description: The atomic model of a two protofilament  $\beta$ 2m fibril. The starting view represents a cross section through a layer of the EM reconstruction, perpendicular to the long fibril axis. Each  $\beta$ 2m subunit is L-shaped, stacked in register, perpendicular to the fibril long (C2) axis, and related by a 180° rotation about the C2 axis. The polypeptide is shown in cartoon representation, coloured from the Nterminus (i.e. M0 would be deep blue) to the C-terminus (M99 would be deep red). Side-chains are coloured in a CPK scheme. In sequence, the following features are highlighted: A steric zipper in the foot; a  $\beta$ -turn in the toe; the disulfide-containing region; and the interface between protofilaments showing  $\pi$ -stacking.
